1

2

3                   Correlated selection on amino acid deletion and  
4                   replacement in mammalian protein sequences

5

6                   Yichen Zheng<sup>1,2</sup>, Dan Graur<sup>2</sup>, Ricardo B. R. Azevedo<sup>2</sup>

7

8    1 Institute of Genetics, University of Cologne, Cologne, NRW 50674, Germany

9    2 Department of Biology and Biochemistry, University of Houston, Texas 77204-5001, USA

10   Email addresses: Yichen Zheng: [yzheng2@uni-koeln.de](mailto:yzheng2@uni-koeln.de); Dan Graur: [dgraur@uh.edu](mailto:dgraur@uh.edu); Ricardo B.

11   R. Azevedo: [razevedo@uh.edu](mailto:razevedo@uh.edu)

12   Corresponding author: Yichen Zheng (+49-221-470-1564)

13

14

15 **Abstract**

16 A low ratio of nonsynonymous and synonymous substitution rates (dN/dS) at a  
17 codon is a sign of functional constraint caused by purifying selection. Intuitively,  
18 the functional constraint would also be expected to prevent such a codon from  
19 being deleted. Oddly, to the best of our knowledge, the correlation between the  
20 rates of deletion and substitution has never actually been estimated. Here, we use  
21 8,595 protein coding-region sequences from 9 mammalian species to examine the  
22 relationship between deletion rate and dN/dS. We found significant positive  
23 correlations at both the level of sites and genes. We compared our data against  
24 controls consisting of simulated coding sequences evolving along identical  
25 phylogenetic trees, where the correlation is not included in the model *a priori*. A  
26 much weaker correlation was found in the corresponding simulated sequences,  
27 which is probably caused by alignment errors. In the real data, the correlations  
28 cannot be explained by alignment errors. Separate investigations on  
29 nonsynonymous (dN) and synonymous (dS) substitution rates indicate that the  
30 correlation is most likely due to a similarity in patterns of selection rather than  
31 mutation rates.

32

33 **Keywords**

34 Mammals, Protein-coding genes, dN/dS, Codon deletion, Purifying selection

35

## 36 **Introduction**

37 The functional constraint on a genomic region is defined by its sensitivity to  
38 mutations, that is, the proportion of mutations that negatively affect its function  
39 (Graur 2016, pp. 116–120). Genomic regions subject to strong functional  
40 constraints are expected to perform important functions and to evolve relatively  
41 slowly. Mutations can take many forms, including nucleotide substitutions,  
42 insertions, and deletions (indels); as a result, functional constraint can be defined  
43 separately with respect to each type of mutation. One might expect functional  
44 constraints with respect to nucleotide substitutions and indels to be correlated — if  
45 the function of a genomic region can be disrupted by a substitution it can probably  
46 also be disrupted by an indel. However, this is not necessarily the case. For  
47 example, nucleotide substitutions at a fourfold degenerate site in a protein-coding  
48 gene may be selectively neutral because the protein product is not affected. If that  
49 fourfold degenerate site is deleted, however, it will cause a frameshift that will  
50 likely disrupt the function of that protein severely. Sites that only experience  
51 selection when they are deleted were referred to as “indifferent DNA” (Graur et al.  
52 2015).

53 Substitutions have been studied more extensively than deletions for two reasons.  
54 First, because indels are more difficult to detect than substitutions (Landan and  
55 Graur 2009; Nagy et al. 2012). Second, because indels have not been modeled  
56 mathematically as well as substitutions (but see Lunter et al. 2006). Nevertheless, a  
57 few studies have attempted to compare the patterns of functional constraint arising  
58 from both kinds of mutations. Taylor et al. (2004) identified 1,743 indel events in  
59 1,282 genes (out of a dataset of 8,148 genes) from human-mouse-rat triple  
60 alignments. They compared indel rates in genes of different functions using Gene  
61 Ontology (Ashburner et al. 2000), and found that intracellular proteins and

62 enzymes are less likely to have indels. When the indel rate differences were  
63 compared with substitution rates (Waterston et al. 2002), a highly similar  
64 distribution among categories was found. These results indicate that functional  
65 categories that are more “important” to an organism tend to have both reduced  
66 amino acid replacement and reduced amino acid loss. One limitation of this study  
67 is that it focused on groups of genes rather than on individual genes.

68 Another study (Miller et al. 2007) used a 28-vertebrate alignment to study coding-  
69 sequence conservation. The authors tested the hypothesis that more conserved  
70 amino acids are more likely to cause diseases when deleted. They analyzed the  
71 gene encoding the enzyme phenylalanine hydroxylase, a gene whose mutations  
72 may cause phenylketonuria. The conservation levels of codons involved in disease-  
73 causing deletions turned out to be the same as for the gene overall. Miller et al.  
74 (2007) concluded that long-term selection against nonsynonymous mutations is  
75 consistent with short-term selection (as implied by diseases) against amino acid  
76 deletions. One strength of this study was the ability to identify deleterious  
77 mutations directly from clinical data. It is, however, only based on a single gene.

78 Chen et al. (2009) studied the ratio of nucleotide substitution to indel rates, across  
79 mammalian and bacterial genomes. They interpreted the ratio as an indicator of the  
80 relative strengths of selection on the two types of mutations. They found that,  
81 within coding regions, more conserved genes have higher substitution to indel  
82 ratios than less conserved genes. This result suggests that indels (even non-  
83 frameshifting ones) are subject to relatively stronger selection than substitutions in  
84 conserved genes. However, as the comparison is focused on which type of  
85 mutation is more common, it does not directly help to resolve the correlation  
86 *between* these two types of changes.

87 In a population-level comparison between 179 human genomes, Montgomery et al.  
88 (2013) found that indel-based variations were highly localized: half of them were  
89 identified in only ~4% of the genome, likely due to mutation rate effects. The  
90 mutation rate heterogeneity was different between indels and substitutions; for  
91 example, recombination hotspots accompanied an increase of indels but not SNPs.  
92 As expected, the authors found evidence that indels in protein-coding sequences  
93 are subject to strong purifying selection. Indeed, even non-frameshift indel variants  
94 were found to have lower allele frequencies (a hallmark of purifying selection)  
95 than non-coding indels.

96 From 14 species along the entire tree of life, the evolution of indel rates were  
97 analyzed by comparing protein sequences (Sung et al. 2016). It was discovered that  
98 indel rate correlates negatively with effective population size, which is already  
99 well-known for substitution rates (Lynch 2010). This is consistent with the Drift-  
100 Barrier Hypothesis, stating in this case that natural selection is expected to reduce  
101 mutation rate to the point where further reduction does not provide enough of a  
102 selective benefit to be more likely to fix when compared to a neutral mutation  
103 (Sung et al. 2012). However, the selection discussed in that paper is selection *on*  
104 *mutation rate*; it does not directly address the selection against substitution and  
105 indels in the entire genome or exome.

106 While these aforementioned studies addressed the relationship between purifying  
107 selection against nonsynonymous substitutions and purifying selection against  
108 deletions, they did not fundamentally answer the question: are the two selection  
109 effects correlated across the genome, and what is the extent of this correlation? If  
110 the correlation does not exist, one can expect the dN/dS ratio of a codon is  
111 independent from its deletion rate. If there is a correlation, the dN/dS ratio would  
112 be proportional to the probability of the codon being deleted. dN will also behave

113 similarly because it is also under selection, while dS would not because it measures  
114 neutral substitutions (Nei and Gojobori 1986; Price and Graur 2016). It is also  
115 possible that the correlation occurs only at the gene level, i.e., genes with higher  
116 dN/dS would have higher deletion rates, but within a gene, the dN/dS and deletion  
117 rate of sites are independent. However, selection is not the only evolutionary force  
118 that may cause a correlation between substitutions and indels; it is possible that  
119 regions with high point mutation rates would also have high indel mutation rates.  
120 In this case, we may see that the deletion rate would be correlated to both dN and  
121 dS, but not with the dN/dS ratio.

122 We used mammalian protein-coding sequences and simulated sequences to study  
123 the correlation between deletion rates and dN/dS, to understand how similar the  
124 patterns of the two types of selection are. In addition, we used dN and dS  
125 separately to estimate their correlations with deletion rates, to test our hypothesis  
126 on whether or not mutation plays a role. We have found that there is indeed a  
127 positive correlation between the rates of deletion and substitution, and it is likely to  
128 be caused by selection, rather than mutation.

129

## 130 **Results**

### 131 **The deletion and nonsynonymous substitution rates per site are positively** 132 **correlated**

133 We collected sequences of protein-coding genes from 9 mammalian genomes (Fig.  
134 1, Lindblad-Toh et al. 2011), and aligned them with PROBCONS (Do et al. 2005).  
135 Simulated alignments were produced along the same phylogenetic tree with  
136 realistic parameters derived from the real data (See Supplementary Text and Fig.  
137 S1). In-frame deletions of length 1-8 amino acids were identified (Fig. 2; see

138 Material and Methods for details); deletion rate, dN, dS and dN/dS were measured  
139 on each codon. Hereafter, we refer to dN, dS, and dN/dS collectively as  
140 “substitution measures.”

141 The correlations between deletion rate and the different substitution measures are  
142 summarized in Fig. 3. In the “All” dataset the deletion rate is positively correlated  
143 with both dN ( $\rho = 0.11$ ) and the dN/dS ratio ( $\rho = 0.08$ ) (Fig. 3A). The  
144 corresponding correlations in the simulated data are much lower (mean  $\rho = 0.01$   
145 and 0.03 for dN/dS and dN, respectively, based on 1,000 bootstrap replicates; Z-  
146 test:  $Z = 57.87$  for dN/dS and  $Z = 61.02$  for dN,  $P < 0.0001$  in both cases). The  
147 signal is even stronger when the true alignments from simulated data are used,  
148 indicating the alignment error causes a small inflation of dN/dS and dN estimates  
149 (Fig. S2). The deletion rate is also positively correlated with dS but the correlation  
150 is weaker than for dN ( $\rho = 0.04$ , Fig. 3A); however, this correlation is significantly  
151 stronger in the real data when compared to the simulated data (mean  $\rho = 0.01$ ;  
152  $Z = 43.36$ ,  $P < 0.0001$ ).

153 To evaluate the robustness of the patterns summarized in Fig. 3A to uncertainty in  
154 the estimates of deletion and substitution rates, we repeated the analysis on the  
155 “NC-4+” dataset, containing only sites that have at least one nucleotide  
156 substitution and that are present (i.e., not gaps) in at least 4 species. The patterns  
157 for dN and dN/dS are essentially unchanged (Fig. 3B). However, the correlation  
158 between deletion rate and dS disappears; indeed, the correlation is *higher* in the  
159 simulated data than in the real data ( $Z = -10.69$ ,  $P < 0.0001$ ). Results for datasets  
160 with different thresholds of non-gap characters are similar to those for “NC-4+”.  
161 These results indicate that the correlation between deletion rate and dS is largely  
162 driven by sites with low substitution rate and/or uncertain estimates of rates of  
163 deletion and substitution. We conclude that rates of deletion and nonsynonymous

164 substitution per site are positively correlated. These results indicate that functional  
165 constraints against amino acid replacement and against amino acid loss are  
166 correlated to each other. Fig. 4 shows the correlation with a density heatmap,  
167 where combinations of substitution measures and deletion rate are plotted.

168 Considering that the interordinal relationship in Laurasiatheria is not entirely  
169 resolved (see Discussion), we re-calculated deletion rate using two alternative trees  
170 and calculated Spearman correlation coefficients with the same methods (Fig. S3).  
171 The difference from calculations based on the main tree is negligible.

172

### 173 **Deleted sites show higher rates of nonsynonymous substitution**

174 If the rates of deletion and substitution are positively correlated then sites found to  
175 be deleted in at least one taxon would be expected to show a higher rate of  
176 substitution than sites that are present in all taxa. Fig. 5 summarizes the results of  
177 an analysis testing this prediction. We used Cohen's  $D$ , a measure of effect size  
178 (Cohen 1988). Cohen's  $D$  is the ratio of the difference between two distributions'  
179 means and their pooled standard deviation.  $D < 0.2$  is considered a small effect size,  
180 while  $D > 0.5$  is a medium or large effect size. As predicted from the correlation  
181 analyses, both dN and dN/dS show medium to large effect sizes in both "All" and  
182 "NC-4+" datasets of the real data, whereas the simulated datasets have very small  
183 effect sizes. The differences for dS are also statistically significant ( $Z = 50.93$  for  
184 "All" and  $Z = 10.94$  for "NC-4+",  $P < 0.0001$  in both cases), but much smaller in  
185 magnitude. Further investigation showed that *some* but not all such effects seen in  
186 simulated data are due to alignment errors (Fig. S4). While both dN and dS has a  
187 positive effect size in TRUE alignment, they are cancelled out when the ratio,



188 dN/dS is used; in such case TRUE alignment shows non-significant effect size in  
189 both “All” and “NC-4+.”

190 Fig. 6 compares the distributions of dN/dS in deleted and non-deleted sites in the  
191 “NC-4+” dataset. In the real data, 63.2% of deleted sites have  $dN/dS \geq 0.2$ , while  
192 the number is 34.8% for non-deleted sites (Fig. 6A). The difference is negligible in  
193 the simulated data (Fig. 6B; 33.6% and 32.2% for deleted and non-deleted sites,  
194 respectively). A two-sample two-tailed Kolmogorov-Smirnov test (Kolmogorov  
195 1933, Smirnov 1948) gives  $D_{KS} = 0.2886$ ,  $n = 7.2 \times 10^4$  &  $3.6 \times 10^6$  for real data and  
196  $D_{KS} = 0.0262$ ,  $n = 4.7 \times 10^5$  &  $2.2 \times 10^7$  for simulated data (both  $P < 0.0001$ ). These  
197 results confirm that rates of deletion and nonsynonymous substitution per site are  
198 positively correlated.

199

## 200 **The deletion and nonsynonymous substitution rates per gene are positively** 201 **correlated**

202 To reduce the stochastic effects caused by limited number of mutations on each  
203 site, we decided to look at the same correlation at the gene level. We used the same  
204 statistical method with gene-averaged deletion rates and substitution measures.

205 As for the site data, the Spearman correlation coefficients between the deletion rate  
206 and substitution measures are significant and positive (Figs. 7 and 8; all  $P <$   
207  $0.0001$ ). However, the strength of correlation depends on the substitution measure  
208 used. For both dN and dN/dS, the correlation is strong ( $\rho \approx 0.5$ ), but for dS it is  
209 weak ( $\rho = 0.14$ ). These correlations disappear completely in the simulated data (Fig.  
210 8), and a negative but non-significant correlation is discovered with TRUE  
211 alignments of the simulated data (Fig. S5). Using a weighted deletion rate based on  
212 number of *codons deleted* and a rate based on number of *deletion events* does not

213 seem to produce substantially different results (Fig. 8A and 8B), although the latter  
214 gives slightly higher correlation coefficients. We conclude that rates of deletion  
215 and nonsynonymous substitution per gene are positively and strongly correlated.

216

## 217 **The deletion and nonsynonymous substitution rates within genes are** 218 **positively correlated**

219 We also analyzed the correlation within genes, to see whether the site-wise  
220 correlation is entirely caused by difference *between* genes. Fig. 9 shows the  
221 distribution of within-gene correlation for both real and simulated data. In real data,  
222 we only used 463 genes in “all” and 454 in “NC-4+” (Fig. S6) that have an  
223 estimated ancestral length over 1,500 aa and contains at least one deletion. In  
224 simulated data, 2,062 genes in “all” and 2,041 genes in “NC-4+” fit the same  
225 criteria and were used. In smaller genes the sample size is too small to generate  
226 reliable correlation coefficients. In dN/dS, the real data gives a slightly higher  
227 correlation compared to the simulated data ( $\rho \approx 0.05$  compared to  $\rho \approx 0.02$ ),  
228 although not to the level of genome-wide, site-wise correlation. dN produced a  
229 similar pattern.

230

231

## 232 **Discussion**

### 233 **Implications on protein sequence evolution**

234 Our study shows that there is indeed a positive correlation between the probability  
235 of a codon being deleted and its dN/dS value (Figs. 3–8), indicating similarity in

236 patterns of purifying selection against deletion and amino acid replacement. dN  
237 also produces a correlation to deletion rates, at a level similar to dN/dS. On the  
238 other hand, such correlation is very weak when dS is used, even undistinguishable  
239 from simulated data in some cases. This is unlikely because both types of mutation  
240 are correlated, because any mutation process affects dN and dS in the same way;  
241 instead, a more plausible explanation is that a common force, purifying selection,  
242 determines both replacement and deletion rates. This can be interpreted as meaning  
243 that both replacement and deletion can damage the function of an amino acid  
244 residue in the protein, thus reducing the fitness of individuals bearing such  
245 mutation. However, this site-wise correlation is weak, on the order of  $\rho \approx 0.1$ ;  
246 therefore, it would be difficult to predict one kind of selection from the other. In  
247 other words, selection against deletions is not completely consistent with selection  
248 against replacement.

249 We believe that one reason for the weakness of the correlation is the existence of  
250 “indifferent DNA” (Graur et al. 2013, 2015). Indifferent DNA refers to sequences  
251 that are subject to strong purifying selection against deletions but not substitutions,  
252 due to its functionality relies more on the length rather than the exact sequences.  
253 For example, it is possible that certain amino acids are required to maintain the  
254 spatial relationships between other amino acids in the protein and, therefore,  
255 cannot be deleted, but can be replaced by multiple amino acids with similar  
256 biochemical properties. Consistent with this idea, the scatter plot in Fig. 7 shows  
257 many genes with low deletion rate and high dN/dS, but few genes with high  
258 deletion rate and low dN/dS.

259 Our study on the correlation between substitutions and indels is the first one that  
260 involves genomic protein-coding genes, and includes both site-wise and gene-wise  
261 analyses. Using the deletion rate inferred from multiple sequence alignments

262 instead of data on genetic diseases (Miller et al. 2007) made the rate estimation  
263 across multiple species rather than human-specific. Alignment-derived deletion  
264 rates are also available as long as the genomes of these species are annotated, while  
265 disease-derived rates are limited to clinical data and lethal sites are excluded.  
266 However, due to alignment errors and partial sequences in some species,  
267 alignment-derived deletion rates are less reliable. Nevertheless, we believe that we  
268 have taken precautions for these disadvantages, respectively by use of simulation  
269 and datasets “4+”/“6+.”

270 The potential non-independence between selection against substitutions and  
271 deletions can also be relevant in studies involving simulated sequence evolution. In  
272 protein simulation, the algorithm writer must decide whether to account for this  
273 correlation. For example, INDELible, one of the most comprehensive and  
274 frequently used simulation programs, does not allow variation of indel rates along  
275 the sequence (Fletcher and Yang 2009). On the other hand, programs like  
276 SIMPROT (Pang et al. 2005) implements an algorithm that chooses indel positions  
277 relative to their substitution rates. ROSE (Stoye et al. 1998) and indel-Seq-Gen  
278 (Strope et al. 2009) limit indels to less conserved regions of sequences.

279

## 280 **Difference between site-wise, gene-wise and within-gene analyses**

281 Site-wise and gene-wise analyses on evolutionary parameters often yield different  
282 results (e.g., Wang et al. 2013). Here, we have shown that the Spearman  
283 correlation between dN, dS as well as dN/dS and deletion rate are much higher in  
284 gene-wise comparisons (Fig. 8) than in site-wise comparisons (Fig. 3). dN/dS  
285 values vary in a much larger range in site-wise than gene-wise analyses (Lindblad-  
286 Toh et al. 2011). The elevated non-synonymous substitution and deletion rates we

287 observed are mostly due to relaxed purifying selection, but it is possible for a tiny  
288 minority of sites (individual amino acids) to undergo positive selection which  
289 yields a dN/dS above 1, causing a negligible effect on the correlation. This is rare  
290 for a whole gene because a protein's basic structure need to be kept consistent for  
291 it to function, and it is almost impossible for the gene-wise signal to be caused by  
292 positive selection. Therefore, a site-wise study can provide a higher resolution on  
293 the selection schemes on the coding part of genomes. On the other hand, site-wise  
294 studies suffer from a low sample size for each data point, and thus larger sampling  
295 error and risk of being over-parameterized (Rodrigue et al. 2010).

296 The difference in the magnitudes of the gene-wise and site-wise correlations  
297 indicates that the gene-wise correlation is not entirely explained by site-wise  
298 correlations within genes. One possible mechanism for this discrepancy are  
299 differences in levels of selective constraint between proteins. Such differences  
300 would be expected to cause a positive correlation among genes that would not be  
301 detectable within genes.

302 An earlier study showed that most indels occur in intrinsically disordered regions  
303 of proteins, which are fast-evolving compared to structured regions (Light et al.  
304 2013). A protein often contains both structured and disordered regions, thus this  
305 correlation would be present in within-gene comparisons, which is consistent with  
306 our results (Fig. 9).

307

### 308 **Artifactual correlation caused by alignment errors**

309 Aside from the biological insights into protein sequence evolution, this study also  
310 provides information about consequences of alignment errors. There is no pre-  
311 determined correlation between indels and dN/dS in the simulated sequences, thus

312 all estimated correlation is due to artifacts. The correlation between dN/dS and  
313 deletion in true alignments of simulated sequences is indistinguishable from zero,  
314 which confirmed this point. The same correlations estimated from inferred  
315 alignment, on the other hand, are consistently higher than zero. The only difference  
316 between them is the presence of alignment error, therefore we can conclude that  
317 the small correlation observed in simulated reconstructed alignments is caused by  
318 alignment errors.

319 Multiple sequence alignment is a mathematically difficult (NP-complete) problem.  
320 While an optimal solution exists theoretically, it cannot be computed within  
321 feasible time. All current multiple sequence alignment algorithms use heuristic  
322 methods. These algorithms typically produce alignments that are shorter than the  
323 true alignment due to preferring mismatches over gaps, and gives mathematically  
324 optimal placements while the real process is sub- or co-optimal (Landan and Graur  
325 2008, 2009). Regions that are rich in insertions and deletions are difficult to align  
326 due to co-optimal placement of gaps, thus putting gaps and mismatches together  
327 more often than it should be.

328 On the other hand, there is a correlation between dN and deletion as well as dS and  
329 deletion in simulated sequences that cannot be explained by alignment errors. This  
330 phenomenon appears in both true and inferred alignments, and in both site-wise  
331 and gene-wise analyses. The most likely explanation is different rates of evolution  
332 (tree length) among different genes, because dN, dS and deletion rate are all  
333 indicators of total evolutionary change along the entire tree.

334

335 **Phase-1 and Phase-2 deletions**

336 A phase-1 or phase-2 codon deletion (deletions that only partially encompass the  
337 first and the last codon involved) can cause an amino acid mismatch without  
338 nucleotide substitutions. They are also called non-conservative deletions because  
339 they do not conserve the undeleted amino acids (de la Chaux et al. 2007). However,  
340 past studies demonstrated that such events are less common than expected by  
341 chance. In a study on pairwise indel event between mouse and rat, 12% of indels  
342 found are non-conservative, in contrast with a simulation expectation of 29%  
343 (Taylor et al. 2004); another study (de la Chaux et al. 2007) gave an even lower  
344 estimate that 4% of all deletions are non-conservative from 3-primate alignments.

345 Unfortunately, with the simulation and alignment methods we used, we could not  
346 account for the effects for such deletions, nor could we mimic them by simulation.  
347 Nevertheless, the mismatch caused by non-conservative deletions usually does not  
348 happen in the same site as the gap. For example, if ACGCAT (Thr-His) became A-  
349 --AT (Asn), the Asn residue will be aligned into one of the sites, while the gap  
350 occupies the other. The elevated dN/dS would thus only occur in the non-gap site.  
351 It is possible that the presence of such a mismatch complicates the alignment  
352 process and attracts other alignment errors, but we are not able to quantify this  
353 effect.

354

### 355 **Long deletions**

356 Our study limited the length of deletion to 8 amino acids (24 nucleotides) or less.  
357 There are several reasons for excluding longer deletions. First, long indels in  
358 protein sequences usually accompany large changes in the protein's function or  
359 structure. Repeatable protein structures such as alpha helix (Scholtz and Baldwin  
360 1992) and zinc finger (Klug and Rhodes 1987) are usually ten amino acids or

361 longer. Such large-scale changes in protein structure usually result in strong fitness  
362 effects and must be studied with a case-by-case basis and integrated with  
363 biochemical experiments. While short indels can have consequences in protein  
364 structural domains, they are usually preserved only in regions with weak purifying  
365 selection and do not change the protein's function drastically (Zhang et al. 2011).  
366 Second, long gaps that can be interpreted as long deletions can co-occur with  
367 alignment difficulties. This includes, again, two situations: (1) Real long deletions  
368 can cause alignment errors because of unrealistic values of gap-extending penalties.  
369 (2) When highly diverged or non-homologous regions are aligned with each other,  
370 long gaps can occur as algorithmic artifacts. Non-homologous sections can exist in  
371 corresponding regions of orthologous proteins if structural mutations such as  
372 translocation occurred.

373

#### 374 **Caveats and future directions**

375 In our study, the simulation part was used as a negative control. In other words, it  
376 was used as a baseline when indel rates and dN/dS are independent from each  
377 other. We suggest that in future studies, a positive control can be implemented. If a  
378 simulation includes a correlation between indel and substitution models (or even  
379 perfectly linearly correlated rates), we could see how the results would compare to  
380 the real data. After all, even if the input indel and replacement rates are perfectly  
381 linear to each other, the site-wise correlation would still not be one because of  
382 stochastic effects.

383 In a neutral indel model by Lunter et al. (2006), the length of intergap segments  
384 (IGSs), gap-free regions of an alignment between two indel events, was identified  
385 as an important parameter. If indels were randomly distributed, IGS lengths would



386 have a geometric distribution; instead, from a human-mouse comparison, this is  
387 only true for segments shorter than 50 bp. However, long IGSs (100 bp or more)  
388 are highly overrepresented than the expectation, indicating blocks that are resistant  
389 to indels, likely due to purifying selection. The model used in our study did not  
390 explicitly include the length of indel-free regions; in future studies it may be  
391 interesting to see which genes have the longest IGSs and how they correspond to  
392 substitution measures. Sampling of additional species would be useful to  
393 distinguish IGSs caused by purifying selection instead of stochastic effects.

394 In the phylogenetic tree used in this study, we put the horse (Perissodactyla) and  
395 the dog (Carnivora) together as sister groups, while the cow (Cetartiodactyla) is a  
396 sister group for the horse+dog clade. This hypothesis of Laurasiatherian evolution,  
397 known as Pegasoferae, is supported by a phylogenetic study using molecular data  
398 (Nishihara et al. 2006). However, the evolutionary relationship among horse, dog  
399 and cow is still under debate. A rival hypothesis groups the horse and the cow  
400 together (Perissodactyla + Cetartiodactyla = Euungulata), to the exclusion of the  
401 dog (Prasad et al. 2008). We have partially addressed the problem by re-calculating  
402 deletion rates using alternative trees and the change of results is negligible (Fig.  
403 S3). However, the FUBAR analysis and production of simulated data are all based  
404 on the Pegasoferae tree, and cannot be redone with other trees due to time  
405 constraints. We reasoned that in the rivaling hypotheses, the branch separating two  
406 of them from the third is very short, and this controversy would have a minimal  
407 effect on the estimation of evolutionary parameters. Therefore, we have arbitrarily  
408 chosen the Pegasoferae hypothesis. It may be a good idea to check if the choice of  
409 phylogenetic tree will affect the result in the future.

410 Incomplete lineage sorting (ILS) occurs when gene tree differs from the species  
411 tree (Maddison 1997), and introduces errors to any analyses based on phylogenetic

412 trees. It is more likely to occur when two or more speciation events occur relatively  
413 close to each other. In our nine-species tree, the group that is most likely to suffer  
414 from such effect is Laurasiatherians (Hallström et al. 2011), but ILS occurring in  
415 other branches cannot be ruled out. We did not account for gene tree heterogeneity  
416 due to computational simplicity, but it may be a potential problem that could be  
417 resolved in future studies. Nevertheless, at least within Laurasiatheria, the use of  
418 alternative trees does not change our results in any meaningful way.

419 Finally, we used only protein-coding sequences in our study, because dN/dS, a  
420 reliable estimator of phylogenetic-level constraint, is only possible in protein-  
421 coding sequences. Selection against indels and substitutions in non-coding regions  
422 can be more efficiently studied in population-level analyses or between closely  
423 related species but this would be beyond the scope of this study. A future direction  
424 could be the extension of our conclusions into non-coding DNA sequences,  
425 especially in RNA genes.

426

## 427 **Conclusion**

428 This study has demonstrated that in the evolution of mammalian proteins, the  
429 selection regimes on amino acid replacement and on short deletions are weakly  
430 correlated to each other. Codons that are less likely to undergo nonsynonymous  
431 substitutions are statistically also less likely to be deleted. However, in practice this  
432 correlation can be overestimated due to the effects of alignment errors.

433

## 434 **Materials and Methods**

### 435 **Data collection and analysis of dN, dS and dN/dS**

436 A list of aligned mammalian protein sequences was taken from Lindblad-Toh et al.  
437 (2011). To make sure that only good-quality genome sequences were used, we  
438 only included data from 9 mammalian species (Fig. 1): human (*Homo sapiens*),  
439 chimpanzee (*Pan tryglodytes*), macaque (*Macaca mulatta*), rat (*Rattus norvegicus*),  
440 mouse (*Mus musculus*), guinea pig (*Cavia porcellus*), dog (*Canis lupus familiaris*),  
441 cow (*Bos taurus*), and horse (*Equus caballus*). We retained 8,605 alignments.  
442 Coding DNA sequences that correspond to these sequences were retrieved from  
443 ENSEMBL 2011 archive (Flicek et al. 2011).

444 All protein sequences were aligned with PROBCONS with default parameters (Do  
445 et al. 2005), and DNA sequences were aligned using the protein alignments as  
446 guides. Maximum likelihood trees were produced with RAxML (Stamatakis 2006)  
447 from the alignments, with a GTR+Gamma model and tree topology restricted to  
448 that of Fig. 1, and all other parameters set to default (standard hill-climbing  
449 algorithm). To reduce bias caused by unrealistic trees, 10 genes that produced a  
450 total tree length above 5 were discarded. (In the 8,605 genes, the mean tree length  
451 is 0.744 and standard deviation is 1.289. The shortest removed tree length is 6.897  
452 and longest retained is 4.038.) Throughout the study, we used the remaining 8,595  
453 genes. This correspond to ~42% of all human protein-coding genes. In  
454 phylogenomic studies, a trade-off between number of species and number of genes  
455 are well-noted; we decided on these nine species because of they represent all main  
456 branches of Boreoeutheria, which contains the vast majority of mammal species;  
457 these are also among the best annotated and highest quality genomes.

458 The DNA alignments were processed through the program HyPhy using the  
459 FUBAR script (Murrell et al. 2013), which estimated the dN and dS of each site  
460 using an approximate Bayesian algorithm, a Markov chain Monte Carlo process

461 that compares a large number of site classes to identify and estimate selection.  
462 Their ratio  $\omega = dN/dS$  was calculated from the output of FUBAR.

463

#### 464 **Deletion identification and statistical analysis**

465 Deletions of 1 to 8 amino acids were identified along seven pairs of branches (Fig.  
466 1). These branch pairs are: (A) human and chimpanzee lineages (red branches,  
467 macaque as outgroup); (B) ape and macaque lineages (green branches, cow as  
468 outgroup); (C) rat and mouse lineages (indigo branches, guinea pig as outgroup);  
469 (D) murid and guinea pig lineages (orange branches, human as outgroup); (E)  
470 primates and rodents lineages (purple branches, cow as outgroup); (F) dog and  
471 horse lineages (yellow branches, cow as outgroup); (G) (dog+horse) and cow  
472 lineages (cyan branches, human as outgroup). The outgroup was used to determine  
473 whether a gap in the alignment is caused by an insertion or a deletion (Fig. 2A). In  
474 branch pair (B), the closest outgroup is a rodent, but cow was chosen because  
475 rodents have long branch lengths. For a lineage containing multiple species (e.g.,  
476 apes), only the branch before the divergence (e.g., divergence between human and  
477 chimpanzee) was analyzed. This was done by combining multiple sequences into  
478 an “ancestral” sequence: any site that is a gap in *all* combined species is a gap site  
479 in the “ancestor”, and if the site is not a gap in at least one of these sequences, it is  
480 considered non-gap in the “ancestor.” In this way, every branch in the nine-species  
481 tree, excluding the root branch, was searched for deletions without repetition. The  
482 root branch (the branch separating the primates-rodents group and other mammals)  
483 was not searched for deletions because the directions of its indels could not be  
484 determined.

485 A fraction of amino acid sites are excluded from analysis because of ambiguity and  
486 difficulties in detecting deletions or substitutions. These sites include gaps in the  
487 outgroup (Fig. 2B), gaps in both ingroup taxa (Fig. 2C), deletions over 8 amino  
488 acids long (Fig. 2D), ambiguous amino acids (Fig. 2E), and terminal gaps (Fig. 2F).  
489 In some cases we excluded a site in the analysis of one lineage pair but not another.

490 The weighted deletion rate of an amino acid site,  $D$ , is calculated as  $D =$

491 
$$\frac{\sum_{i=1}^7 D_i}{\sum_{i=1}^7 (L_i \times V_i)}$$
.  $D_i = 1$  if that site is part of a deletion in the  $i$ th lineage pair, and 0

492 otherwise;  $V_i = 1$  if that site is **not** excluded in that lineage pair, and 0 otherwise;  $L_i$   
493 is the sum of branch lengths of the  $i$ th lineage pair, based on the placental tree  
494 (without chromosome X) from human/hg19/GRCh37 46 species multiple  
495 alignment ([http://genomewiki.ucsc.edu/index.php/Human/hg19/GRCh37\\_46-](http://genomewiki.ucsc.edu/index.php/Human/hg19/GRCh37_46-way_multiple_alignment)  
496 [way\\_multiple\\_alignment](http://genomewiki.ucsc.edu/index.php/Human/hg19/GRCh37_46-way_multiple_alignment), Kent et al. 2002; Fig. 1).

497 Site-wise weighted deletion rates were re-calculated using two alternative trees that  
498 differ from the main tree in the relationship within Laurasiatheria; in one tree the  
499 horse and the cow were considered sister groups (Euungulata) and in the other the  
500 dog and the cow were considered sister groups. Because the branch lengths were  
501 not available for alternative trees, we used an *ad hoc* approach that kept the length  
502 of terminal branches and used the length of the internal branch (the one separating  
503 the horse-dog ancestor from the Laurasiatheria ancestor) for the new internal  
504 branches. This has minimal effects on deletion rate estimation because this branch  
505 is very short.

506 The weighted deletion rate of a gene,  $D_G$  is calculated as  $D_G = \frac{\sum_{j=1}^n \sum_{i=1}^7 D_{ij}}{\sum_{j=1}^n \sum_{i=1}^7 (L_{ij} \times V_{ij})}$ ,

507 where  $n$  is the number of codons in the gene,  $D_{ij}$  is  $D_i$  in the  $j$ th codon in that gene,  
508 and  $L_{ij}$  is  $L_i$  in the  $j$ th codon in that gene.

509 An alternative gene-wise deletion rate is calculated as  $D_{GN} = \frac{N}{\sum_{j=1}^n \sum_{i=1}^7 (L_{ij} \times V_{ij})}$

510 where  $N$  is the number of deletion events identified in any lineage in that gene.  $D_{GN}$   
511 is called the event-number deletion rate of a gene.

512 For each amino acid site in each alignment, its deletion rate and three substitution  
513 measures (dN, dS and dN/dS) were obtained. For each alignment method,  
514 Spearman correlation coefficients were calculated between the weighted deletion  
515 rate,  $D$ , and the three substitution measures. This dataset uses all sites and is thus  
516 named “**All**.” See Table 1 for summary statistics on this dataset.

517 To reduce the effects of spuriously high or low values of dN/dS due to “gappy”  
518 sites, the correlation coefficients were recalculated for (1) sites that have not  
519 experienced a gap event in at least four sequences, and (2) sites that have not  
520 experienced a gap event in at least six sequences. These datasets are referred to as  
521 “**4+**” and “**6+**”, respectively. Many sites have not experienced any nucleotide  
522 substitution, and their dN/dS is technically incalculable due to division by 0, only  
523 approximated using extrapolation from other sites. Therefore, we generated sub-  
524 datasets in which these constant sites were excluded. These datasets were named  
525 “**NC-All**,” “**NC-4+**” and “**NC-6+**,” where “NC” stands for “no constant.”

526

## 527 **Coding sequence simulation and analysis**

528 We simulated coding DNA sequences using INDELible (Fletcher and Yang 2009).  
529 INDELible evolves nucleotide sequences along the input tree based on a nucleotide  
530 substitution model. These substitutions are subject to selection as determined by  
531 dN/dS, randomly drawn from an input distribution for each site. Insertions and  
532 deletions, always multiples of three nucleotides, are independently modeled and

533 have a uniform rate among sites; however, the number of indels is proportional to  
534 the branch length.

535 We simulated a total of 8,595 genes  $\times$  5 replicates. For each gene, the ancestral  
536 gene length and level of divergence were based on the values derived from the  
537 corresponding real gene (see Supplementary Text and Fig. S1 for details). The  
538 distribution of dN/dS was a gamma distribution with a shape parameter of  $\alpha = 0.5$   
539 (approximated from real data) and a mean calculated from its real data counterpart.  
540 The distribution was discretized into 50 bins between 0 and 1 (0–0.02, 0.02–  
541 0.04 ...), 20 bins between 1 and 2 (1–1.05, 1.05–1.1 ...) and 1 bin above 2. In each  
542 bin, the dN/dS value used was the median. If a bin (usually the ones with highest  
543 dN/dS) has a probability below  $10^{-6}$  in the gamma distribution, it was not used.  
544 The absolute deletion rate for each gene was drawn from a gamma distribution  
545 with a shape parameter of  $\alpha = 0.6$  (approximated from real data) and mean = 0.79  
546 (the mean  $S_{AI}$  from the real data), so that it is independent from substitution rate  
547 (see Supplementary Text); the relative indel rate was calculated based on absolute  
548 indel rate and branch lengths. Indel length was modeled with a power law  
549 distribution with the maximal length of 40 codons (Cartwright 2009).

550 The simulated protein sequences were aligned with PROBCONS (alternative  
551 alignment tools give identical results), and then nucleotide alignments were  
552 threaded through the protein alignments. We estimated deletion rates and  
553 substitution measures based on these alignments, as well as for the “true”  
554 alignment (as control for alignment error), as described above for real data. See  
555 Table 1 for summary statistics on the simulated data.

556 We used bootstrapping to generate plausible ranges of values of the sequence  
557 statistics to compare with the ones obtained from real data. We generated 1,000

558 bootstrap subsets of the simulated data. In each subset, one random replicate was  
559 chosen from the five for each of the 8,595 genes. Spearman correlation coefficients  
560 were calculated for each subset. Each subset was processed as described for real  
561 data to generate datasets of each type (“All,” “4+,” “6+,” “NC-All,” “NC-4+,” and  
562 “NC-6+”). For the Spearman correlation coefficients, the mean, standard deviation,  
563 and 2.5% and 97.5% quantiles were calculated. We used Z-tests to compare the  
564 Spearman coefficients derived from real and simulated data.

565

### 566 **Distribution of dN/dS in deleted sites**

567 All real mammalian protein sites that have undergone at least one deletion in any  
568 lineage were extracted from the data set and their distributions of estimated dN/dS  
569 are computed. The distributions were compared with those from deletion-free sites  
570 with  $\chi^2$  tests. Effect sizes (Cohen’s *D*, Cohen 1988) were calculated between dN/dS  
571 distributions in deletion and non-deletion codons. These analyses were only done  
572 on “All” and “NC-4+” datasets as representative of all six datasets. These  
573 procedures were repeated for the simulated data. Similar to the previous section,  
574 1,000 bootstrap subsets were used, and the mean, standard deviation, and 2.5% and  
575 97.5% quantiles were calculated. Z-tests were used to compare real to simulated  
576 data.

577

### 578 **Analysis of gene-wise and within-gene correlations**

579 For both real and simulated data, we calculated gene-wise dN, dS, dN/dS and  
580 deletion rate. Gene-wise dN and dS are the mean of corresponding values of “4+”  
581 sites over the whole gene. We did not use “NC-4+” because excluding substitution-



582 free sites is likely to lead to overestimation of the substitution measures. Gene-wise  
583 dN/dS is gene-wise dN divided by gene-wise dS. The calculation of two alternative  
584 gene-wise deletion rates,  $D_G$  and  $D_{GN}$ , is described in a previous sub-section.

585 We calculated the Spearman correlation between gene-level deletion rate and  
586 substitution measures in both real and simulated data. Similar to previous sections,  
587 in the simulated data bootstrapping is used. Each subsample includes only one  
588 replicate for every simulated gene. The mean, standard deviation, and 2.5% and  
589 97.5% quantiles were calculated. Z-tests were used to compare real to simulated  
590 data.

591 We calculated within-gene Spearman correlation between deletion rates and  
592 substitution measures, using 466 real genes and  $466 \times 5 = 2,330$  simulated genes  
593 that have the derived “ancestral gene length” longer than 1,500 amino acids. The  
594 correlation coefficients are calculated for both “all” and “NC-4+” datasets. For the  
595 real data, genes (three such genes in “all” and twelve in “NC-4+”) that do not have  
596 any deletions identified were removed from the data, while the rest (463 in “all”  
597 and 454 in “NC-4+”) were used to calculate the mean and standard deviation.

598

## 599 **Acknowledgements**

600 We used the Maxwell cluster from the Center of Advanced Computing and Data  
601 Systems (CACDS) at the University of Houston. CACDS staff provided technical  
602 support. We would like to thank Sarah Parks and her colleagues at EMBL-  
603 European Bioinformatics Institute for their help in running the SLR program on  
604 part of our data. R.B.R.A. was funded by NIH R01GM101352. We would also like  
605 to thank Jaanus Suurväli and Jan Gravemeyer at University of Cologne for their  
606 help in manuscript editing.

607

## 608 **Data availability**

609 We uploaded our real and simulated alignments as well as Perl scripts of key steps  
610 on GitHub project “Mammal-Protein-Selection” ([https://github.com/y-](https://github.com/y-zheng/Mammal-Protein-Selection)  
611 [zheng/Mammal-Protein-Selection](https://github.com/y-zheng/Mammal-Protein-Selection)).

612

## 613 **References**

- 614 Ashburner M, Ball CA, Blake JA, Botstein D, Butler H, Cherry JM, Davis AP, Dolinski K, Dwight SS,  
615 Eppig JT, Harris MA. (2000) Gene Ontology: tool for the unification of biology. *Nat Genet.* 25(1):25.
- 616 Cartwright R. (2009) Problems and Solutions for Estimating Indel Rates and Length Distributions. *Mol*  
617 *Biol Evol.* 26:473–480.
- 618 Chen J-Q, Wu Y, Yang H, Bergelson J, Kreitman M, Tian D. (2009) Variation in the Ratio of Nucleotide  
619 Substitution and Indel Rates across Genomes in Mammals and Bacteria. *Mol Biol Evol* 26:1523–1531.
- 620 Cohen J. (1988) *Statistical Power Analysis for the Behavioral Sciences* (second ed.). Lawrence Erlbaum  
621 Associates. 67.
- 622 de la Chaux N, Messer PW, Arndt PF. (2007) DNA indels in coding regions reveal selective constraints  
623 on protein evolution in the human lineage. *BMC Evol Biol* 7:19.
- 624 Do CB, Mahabhashyam MSP, Brudno M, Batzoglou S. (2005) ProbCons: Probabilistic consistency-based  
625 multiple sequence alignment. ProbCons: Probabilistic consistency-based multiple sequence alignment.  
626 *Genome Res* 15:330–340.
- 627 Fletcher W, Yang Z. (2009) INDELible: A Flexible Simulator of Biological Sequence Evolution. *Mol*  
628 *Biol Evol* 26:1879–1888.
- 629 Flicek P, Amode MR, Barrell D, Beal K, Brent S, Chen Y, Clapham P, Coates C, Fairley S, Fitzgerald S,  
630 et al. (2011) Ensembl 2011. *Nucleic Acids Res* 39:D800–D806.
- 631 Graur D. (2016) *Molecular and Genome Evolution*. Sinauer Associates, Sunderland, MA.
- 632 Graur D, Zheng Y, Azevedo RBR. (2015) An evolutionary classification of genomic function. *Genome*  
633 *Biol Evol* 7:642–645.
- 634 Graur D, Zheng Y, Price N, Azevedo RBR, Zufall RA, Elhaik E. (2013) On the Immortality of Television  
635 Sets: “Function” in the Human Genome According to the Evolution-Free Gospel of ENCODE. *Genome*  
636 *Biol Evol* 5:578–590.
- 637 Hallström BM, Schneider A, Zoller S, Janke A. (2011) A genomic approach to examine the complex  
638 evolution of laurasiatherian mammals. *PLoS One.* 6(12):e28199.

- 639 Kent WJ, Sugnet CW, Furey TS, Roskin KM, Pringle TH, Zahler AM, Haussler D. (2002) The human  
640 genome browser at UCSC. *Genome Res* 12:996–1006.
- 641 Klug A, Rhodes D. (1987) Zinc fingers: a novel protein fold for nucleic acid recognition. *Cold Spring  
642 Harb Symp Quant Biol* 52:473–482.
- 643 Kolmogorov A (1933). Sulla determinazione empirica di una legge di distribuzione. *G. Ist. Ital. Attuari.*  
644 4:83–91.
- 645 Landan G, Graur D. (2008) Local reliability measures from sets of co-optimal multiple sequence  
646 alignments. *Pac Symp Biocomput* 13:15–24.
- 647 Landan G, Graur D. (2009) Characterization of pairwise and multiple sequence alignment errors. *Gene*  
648 441:141–147.
- 649 Light S, Sagit R, Ekman D, Elofsson A. (2013) Long indels are disordered: a study of disorder and indels  
650 in homologous eukaryotic proteins. *Biochim. Biophys. Acta, Proteins Proteomics.* 1834(5):890–897.
- 651 Lindblad-Toh K, Garber M, Zuk O, Lin MF, Parker BJ, Washietl S, Kheradpour P, Ernst J, Jordan G,  
652 Mauceli E, et al. (2011) A high-resolution map of human evolutionary constraint using 29 mammals.  
653 *Nature* 478: 476–482.
- 654 Lunter G, Ponting CP, Hein J. (2006) Genome-wide identification of human functional DNA using a  
655 neutral indel model. *PLoS Comp Biol.* 2(1):e5.
- 656 Lynch M. (2010) Evolution of the mutation rate. *Trends Genet.* 26(8):345–352.
- 657 Maddison WP. (1997) Gene trees in species trees. *Syst Biol.* 46(3):523–536.
- 658 Miller W, Rosenbloom K, Hardison RC, Hou M, Taylor J, Raney B, Burhans R, King DC, Baertsch R,  
659 Blankenberg D, et al. (2007) 28-Way vertebrate alignment and conservation track in the UCSC Genome  
660 Browser. *Genome Res.* 17:1797–1808.
- 661 Montgomery SB, Goode DL, Kvikstad E, Albers CA, Zhang ZD, Mu XJ, Ananda G, Howie B,  
662 Karczewski KJ, Smith KS, Anaya V. (2013) The origin, evolution, and functional impact of short  
663 insertion–deletion variants identified in 179 human genomes. *Genome Res.* 23(5):749–761.
- 664 Murrell B, Moola S, Mabona A, Weighill T, Sheward D, Pond SLK, Scheffler K. (2013) FUBAR: A Fast,  
665 Unconstrained Bayesian AppRoximation for Inferring Selection. *Mol Biol Evol* 30:1196–1205.
- 666 Nagy LG, Kocsubé S, Csanádi Z, Kovács GM, Petkovits T, Vágvölgyi C, Papp T. (2012) Re-mind the  
667 gap! Insertion–deletion data reveal neglected phylogenetic potential of the nuclear ribosomal internal  
668 transcribed spacer (ITS) of fungi. *PloS One* 7:e49794.
- 669 Nei M, Gojobori T. (1986) Simple methods for estimating the numbers of synonymous and  
670 nonsynonymous nucleotide substitutions. *Mol Biol Evol* 3:418–426.
- 671 Nishihara H, Hasegawa M, Okada N. (2006) Pegasoferae, an unexpected mammalian clade revealed by  
672 tracking ancient retroposon insertions. *P Natl Acad Sci USA* 103: 9929–9934.
- 673 Pang A, Smith AD, Nuin PAS, Tillier ERM. (2005) SIMPROT: Using an empirically determined indel  
674 distribution in simulations of protein evolution. *BMC Bioinformatics* 6:236.
- 675 Prasad AB, Allard MW, NISC Comparative Sequencing Program, Green EE. (2008) Confirming the  
676 phylogeny of mammals by use of large comparative sequence data sets. *Mol Biol Evol* 25:1795–1808.

- 677 Price N, Graur D. (2016) Are Synonymous Sites in Primates and Rodents Functionally Constrained? *J*  
678 *Mol Evol* 82:51–64.
- 679 Rodrigue N, Philippe H, Lartillot N. (2010) Mutation-selection models of coding sequence evolution with  
680 site-heterogeneous amino acid fitness profiles. *Proc Natl Acad Sci USA* 107(10):4629–4634.
- 681 Scholtz JM, Baldwin RL. (1992) The mechanism of alpha-helix formation by peptides. *Annu Rev Biophys*  
682 *Biomol Struct* 21(1):95–118.
- 683 Smirnov N (1948). Table for estimating the goodness of fit of empirical distributions. *Ann Math Stat*  
684 19:279–281.
- 685 Stamatakis A. (2006) RAxML-VI-HPC: maximum likelihood-based phylogenetic analyses with  
686 thousands of taxa and mixed models. *Bioinformatics* 22:2688–2690.
- 687 Stoye J, Ever D, Meyer F. (1998) Rose: generating sequence families. *Bioinformatics* 14:157–163.
- 688 Strobe CL, Abel K, Scott SD, Moriyama EN. (2009) Biological Sequence Simulation for Testing  
689 Complex Evolutionary Hypotheses: indel-Seq-Gen Version 2.0. *Mol Biol Evol* 26:2581–2593.
- 690 Sung W, Ackerman MS, Dillon MM, Platt TG, Fuqua C, Cooper VS, Lynch M. (2016) Evolution of the  
691 insertion-deletion mutation rate across the tree of life. *G3: Genes, Genomes, Genetics*. 6(8):2583–2591.
- 692 Sung W, Ackerman MS, Miller SF, Doak TG, Lynch M. (2012) Drift-barrier hypothesis and mutation-  
693 rate evolution. *Proc Natl Acad Sci USA* 109(45):18488–18492.
- 694 Taylor MS, Ponting CP, Copley RR. (2004) Occurrence and Consequences of Coding Sequence  
695 Insertions and Deletions in Mammalian Genomes. *Genome Res* 14:555–566.
- 696 Wang H, Susko E, Roger AJ. (2013) The Site-Wise Log-Likelihood Score is a Good Predictor of Genes  
697 under Positive Selection. *J Mol Evol* 76:280–294.
- 698 Waterston RH, Lindblad-Toh K, Birney E, Rogers J, Abril JF, Agarwal P, Agarwala R, Ainscough R,  
699 Alexandersson M, An P, et al. (2002) Initial sequencing and comparative analysis of the mouse genome.  
700 *Nature* 420:520–562.
- 701 Zhang Z, Huang J, Wang Z, Wang L, Gao P. (2011) Impact of indels on the flanking regions in structural  
702 domains. *Mol Biol Evol* 28(1):291–301.
- 703
- 704
- 705

706 **Figure legends**

707

708 **Fig. 1** The commonly accepted phylogenetic relationship among the 9 species used in this study.  
709 This tree will be called the external reference tree throughout the paper. Seven different colors  
710 denote seven pairs of branches/lineages (A–G) on which deletions were estimated. The black-  
711 colored branches are the root of the tree. The branch lengths of the 9-species tree are derived  
712 from UCSC Human/hg19/GRCh37 46-way multiple alignment (Kent et al. 2002). These branch  
713 lengths are used as guidance for simulation and estimation of deletion rates.

714

715 **Fig. 2** Illustration of how we identify deletion events and non-used sites in protein sequences for  
716 each pair of lineages. **A.** Identified short deletion at sites 3 and 4 in taxon 1. **B.** Excluded sites 3  
717 and 4 because of gaps in the outgroup. **C.** Excluded sites 3 and 4 because both ingroup taxa  
718 contain gaps at those positions, thus it is impossible to know whether it is an insertion or a  
719 deletion. **D.** Excluded sites 3–12 because of long (> 8aa) deletion. **E.** Excluded sites 2–5 because  
720 of unknown amino acids. **F.** Excluded sites 5 and 6 because they are included in a terminal gap.

721

722 **Fig. 3** Rates of deletion and substitution per site are positively correlated. Spearman correlation  
723 between deletion rate and substitution measures (dN/dS, dN and dS) in real and simulated data.  
724 **A.** Based on the “All” dataset. **B.** Based on the “NC-4+” dataset, where all sites without any  
725 substitutions or present in less than four species were removed. For the simulated data, the value  
726 shown is the mean of 1,000 bootstrap replicates, and the error bars are 2.5% to 97.5% quantiles.  
727 Real data produces higher correlations than simulated data for all measures.

728

729 **Fig. 4** Density heatmap showing joint distribution of substitution measures and deletion rate in  
730 “All” dataset. **A.** Real data, dN/dS; **B.** Real data, dN; **C.** Real data, dS; **D.** Simulated data, dN/dS;  
731 **E.** Simulated data, dN; **F.** Simulated data, dS.

732

733 **Fig. 5** Effect size (Cohen’s D) indicating the difference of substitution measures (dN/dS, dN and  
734 dS) means between deleted and non-deleted sites. **A.** Based on the “All” dataset. **B.** Based on the  
735 “NC-4+” dataset, where all sites without any substitutions or present in less than four species  
736 were removed. For the simulated data, the shown value is the mean of 1,000 bootstrap re-  
737 samplings, and the error bars are 2.5% to 97.5% quantiles.

738

739 **Fig. 6** Histograms showing dN/dS distribution comparisons between sites with and without  
740 deletion, in both **A.** real and **B.** simulated data aligned with PROBCONS. The axis marks the  
741 lower bound of each bin, i.e. the bin marked “0” indicates  $0 \leq dN/dS < 0.1$ . It can be observed that  
742 the distributions are much more different in real data than in simulated data: the non-deleted sites  
743 have a heavier left tail, while the deleted sites have a heavier right tail.

744

745 **Fig. 7** Gene-wise deletion rates plotted against dN/dS, in both **A.** real and **B.** simulated data. In  
746 real data, genes with high dN/dS (right) are more likely to have high deletion rate (up), which is  
747 not true in simulated data.

748

749 **Fig. 8** Gene-wise Spearman correlations between deletion rate and substitution (dN/dS, dN and  
750 dS) in real and simulated data. In both dN/dS and dN, the correlation in real data is very high ( $\approx$   
751 0.45) compared to simulated data ( $< 0.05$ ); the difference is much less pronounced in dS. For the  
752 simulated data, the shown value is the mean of 1,000 bootstrap re-samplings, and the error bars  
753 are 2.5% to 97.5% quantiles. The deletion rate was calculated based on **A.** number of codons  
754 deleted, **B.** number of deletion events.

755

756 **Fig. 9** Histograms of distributions of within-gene Spearman correlation between substitution  
757 measures and deletion rate, using “All” dataset. Data are based on genes with an “ancestral”  
758 length of over 500 codons, and at least one deletion event. A total of 463 real genes and 2,062  
759 simulated genes were used. **A.** Real data, dN/dS; **B.** Real data, dN; **C.** Real data, dS; **D.**  
760 Simulated data, dN/dS; **E.** Simulated data, dN; **F.** Simulated data, dS.

761

## 762 **Supplementary Files**

763 Supplementary File 1. Contains Supplementary Text and Supplementary Figures 1-6.

764       Supplementary Text: Preliminary rounds of simulations to obtain simulation parameters

765       Supplementary Figure 1: Flowchart describing the derivation and application of  
766 simulation parameters

767       Supplementary Figure 2: Comparison between reconstructed and true alignment:  
768 Spearman correlation between site-wise deletion rate and substitution measures

769           Supplementary Figure 3: Spearman correlation between deletion rate and substitution  
770 measures (dN/dS, dN and dS) in real and simulated data, with the deletions detected using  
771 alternative tree topologies regarding the internal relationship of Laurasiatheria.

772           Supplementary Figure 4: Comparison between reconstructed and true alignment: Cohen's  
773 D between substitution measures in deleted and nondeleted sites

774           Supplementary Figure 5. Comparison between reconstructed and true alignment:  
775 Spearman correlation between gene-wise deletion rate and substitution measures

776           Supplementary Figure 6. Histograms of distributions of within-gene Spearman  
777 correlation between substitution measures and deletion rate, using "NC-4+" dataset.

778

779 **Table 1** A summary of our data, both real and simulated, based on “All” dataset. The Simulated Data  
780 was analyzed separately for the PROBCONS realignment and the true alignment. Cohen’s Ds were  
781 calculated for some statistics between real and simulated data aligned with PROBCONS to quantify the  
782 similarity between the two datasets.

|                                      | Real Data<br>(PROBCONS) | Simulated Data<br>(PROBCONS) | Cohen’s D between<br>real and simulated<br>data (PROBCONS) | Simulated Data<br>(TRUE) |
|--------------------------------------|-------------------------|------------------------------|------------------------------------------------------------|--------------------------|
| Number of genes                      | 8,595                   | 42,975                       | N/A                                                        | 42,975                   |
| Total alignment length (aa)          | 5675396                 | 28458331                     | N/A                                                        | 28465275                 |
| Proportion of constant sites         | 0.3106                  | 0.2266                       | N/A                                                        | 0.2275                   |
| Number of deletions                  | 50698                   | 338330                       | N/A                                                        | 340895                   |
| Mean deletion size (aa)              | 1.9591 (1.5845)         | 1.9218 (1.5434)              | 0.0238                                                     | 1.9274 (1.5412)          |
| Mean site-wise dN (sd)               | 0.3326 (0.9098)         | 0.2804 (0.5671)              | 0.0689                                                     | 0.2793 (0.5625)          |
| Mean site-wise dS (sd)               | 1.9526 (2.6370)         | 1.5625 (1.8169)              | 0.1722                                                     | 1.5586 (1.8032)          |
| Mean site-wise dN/dS (sd)            | 0.2687 (0.4891)         | 0.2705 (0.5630)              | 0.0034                                                     | 0.2705 (0.5654)          |
| Mean site-wise deletion<br>rate (sd) | 0.0353 (0.8410)         | 0.0246 (0.2115)              | 0.0174                                                     | 0.0245 (0.1862)          |
| Mean gene-wise dN (sd)               | 0.3595 (0.2087)         | 0.2983 (0.1432)              | 0.3419                                                     | 0.2974 (0.1433)          |
| Mean gene-wise dS (sd)               | 2.1206 (0.4309)         | 1.6833 (0.2955)              | 1.1836                                                     | 1.6789 (0.2936)          |
| Mean gene-wise dN/dS<br>(sd)         | 0.1702 (0.0940)         | 0.1790 (0.0884)              | 0.0964                                                     | 0.1789 (0.0888)          |
| Mean gene-wise deletion<br>rate (sd) | 0.0166 (0.0222)         | 0.0186 (0.0258)              | 0.0831                                                     | 0.0189 (0.0266)          |

783



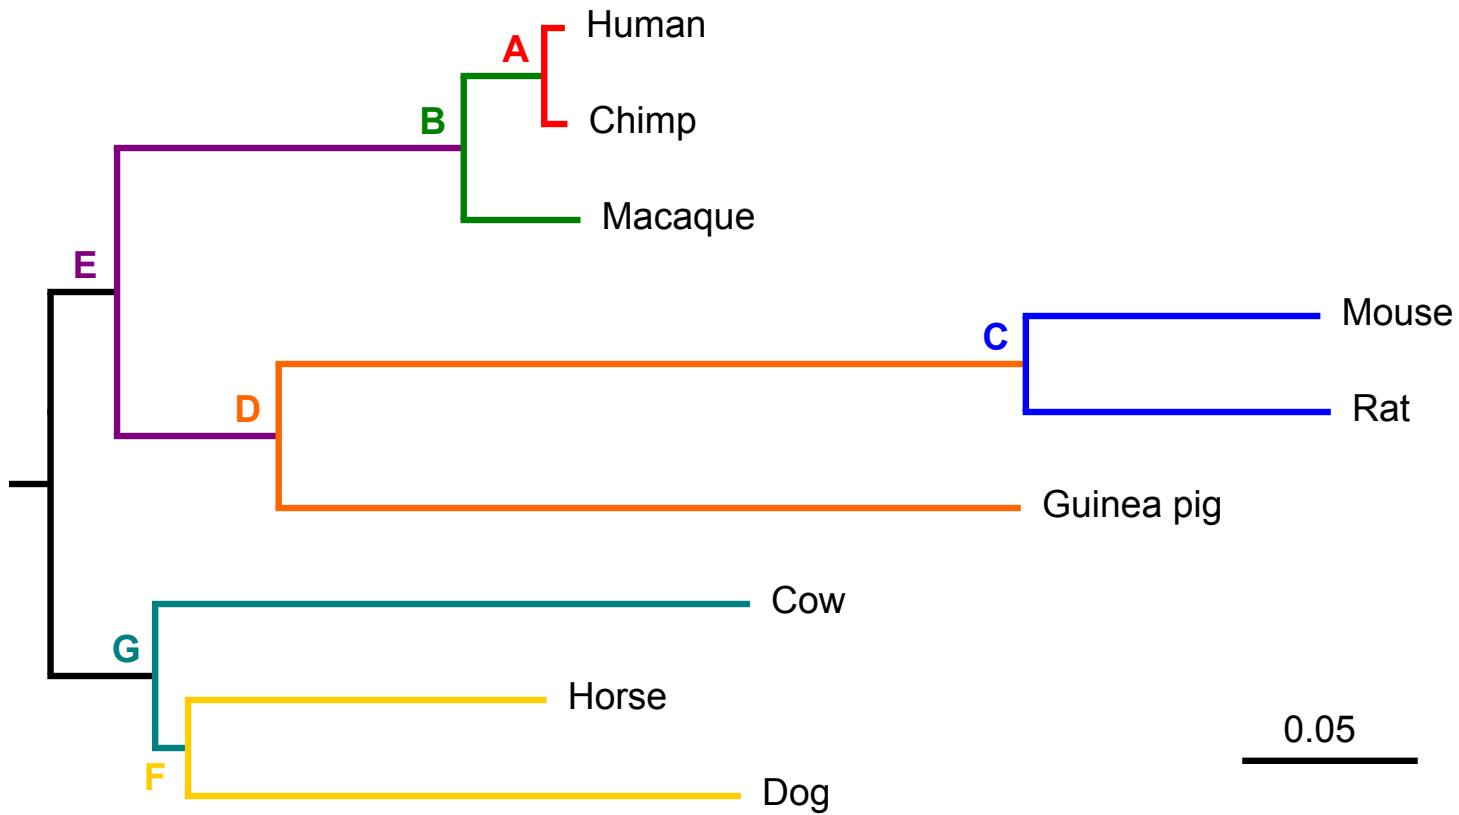

(A)

|           |   |   |   |   |   |   |
|-----------|---|---|---|---|---|---|
| Ingroup 1 | A | C | - | - | E | F |
| Ingroup 2 | A | C | C | D | E | F |
| Outgroup  | A | C | C | D | E | F |

(B)

|           |   |   |   |   |   |   |
|-----------|---|---|---|---|---|---|
| Ingroup 1 | A | C | C | D | E | F |
| Ingroup 2 | A | C | C | D | E | F |
| Outgroup  | A | C | - | - | E | F |

(C)

|           |   |   |   |   |   |   |
|-----------|---|---|---|---|---|---|
| Ingroup 1 | A | C | - | - | E | F |
| Ingroup 2 | A | C | - | - | E | F |
| Outgroup  | A | C | C | D | E | F |

(D)

|           |   |   |   |   |   |   |   |   |   |   |   |   |   |
|-----------|---|---|---|---|---|---|---|---|---|---|---|---|---|
| Ingroup 1 | A | C | - | - | - | - | - | - | - | - | - | N |   |
| Ingroup 2 | A | C | C | D | E | F | G | H | I | K | L | M | N |
| Outgroup  | A | C | C | D | E | F | G | H | I | K | L | M | N |

(E)

|           |   |   |   |   |   |   |
|-----------|---|---|---|---|---|---|
| Ingroup 1 | A | C | C | D | E | F |
| Ingroup 2 | A | X | X | X | X | F |
| Outgroup  | A | C | C | D | E | F |

(F)

|           |   |   |   |   |   |   |
|-----------|---|---|---|---|---|---|
| Ingroup 1 | A | C | C | D | E | F |
| Ingroup 2 | A | C | C | D | - | - |
| Outgroup  | A | C | C | D | E | F |

A

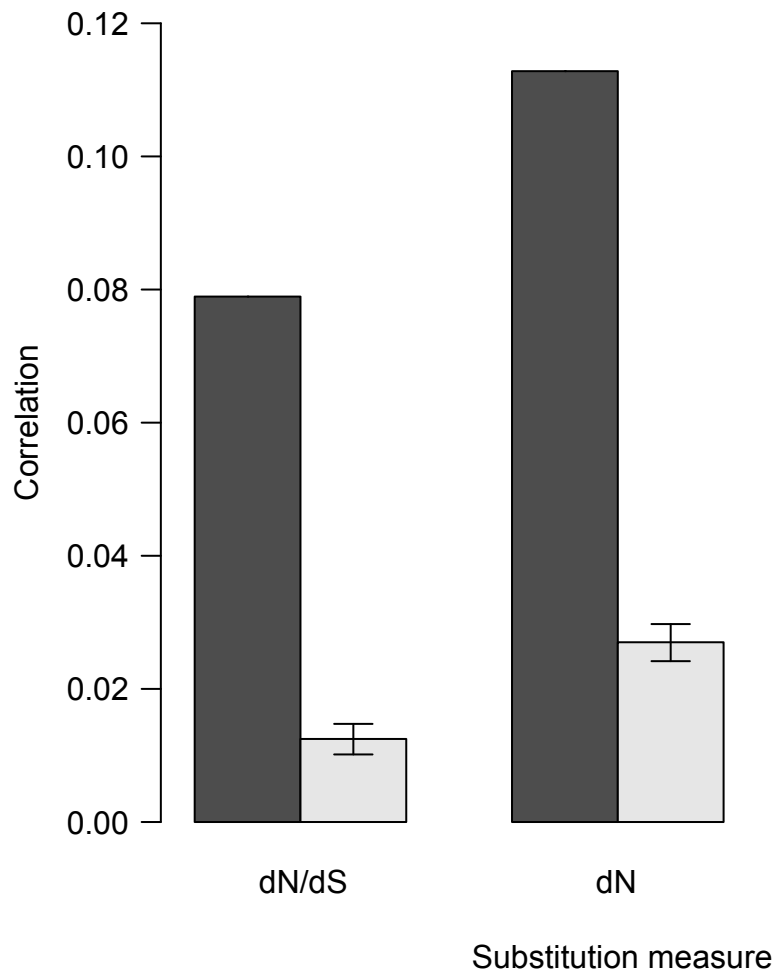

B

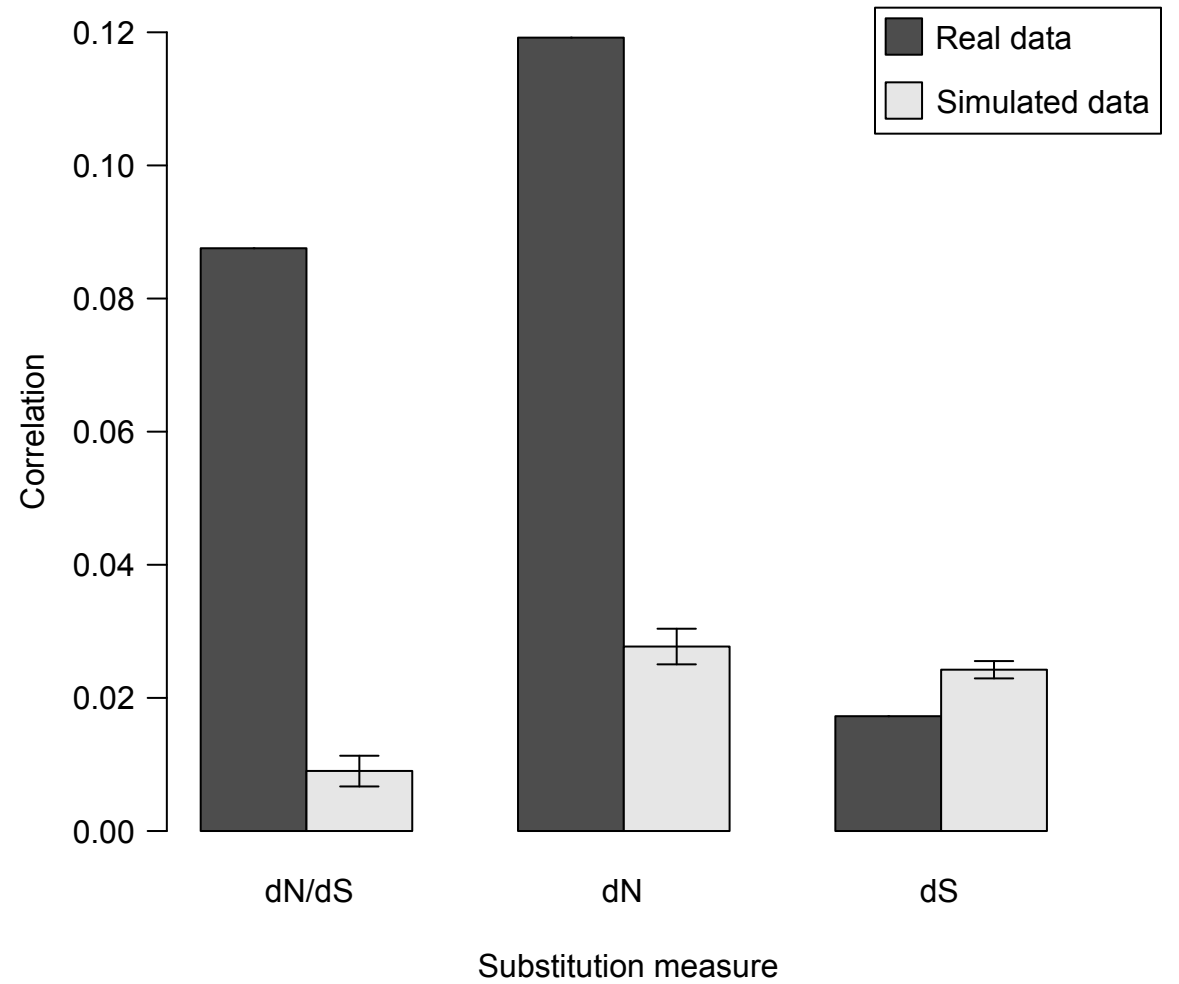

A. dN/dS

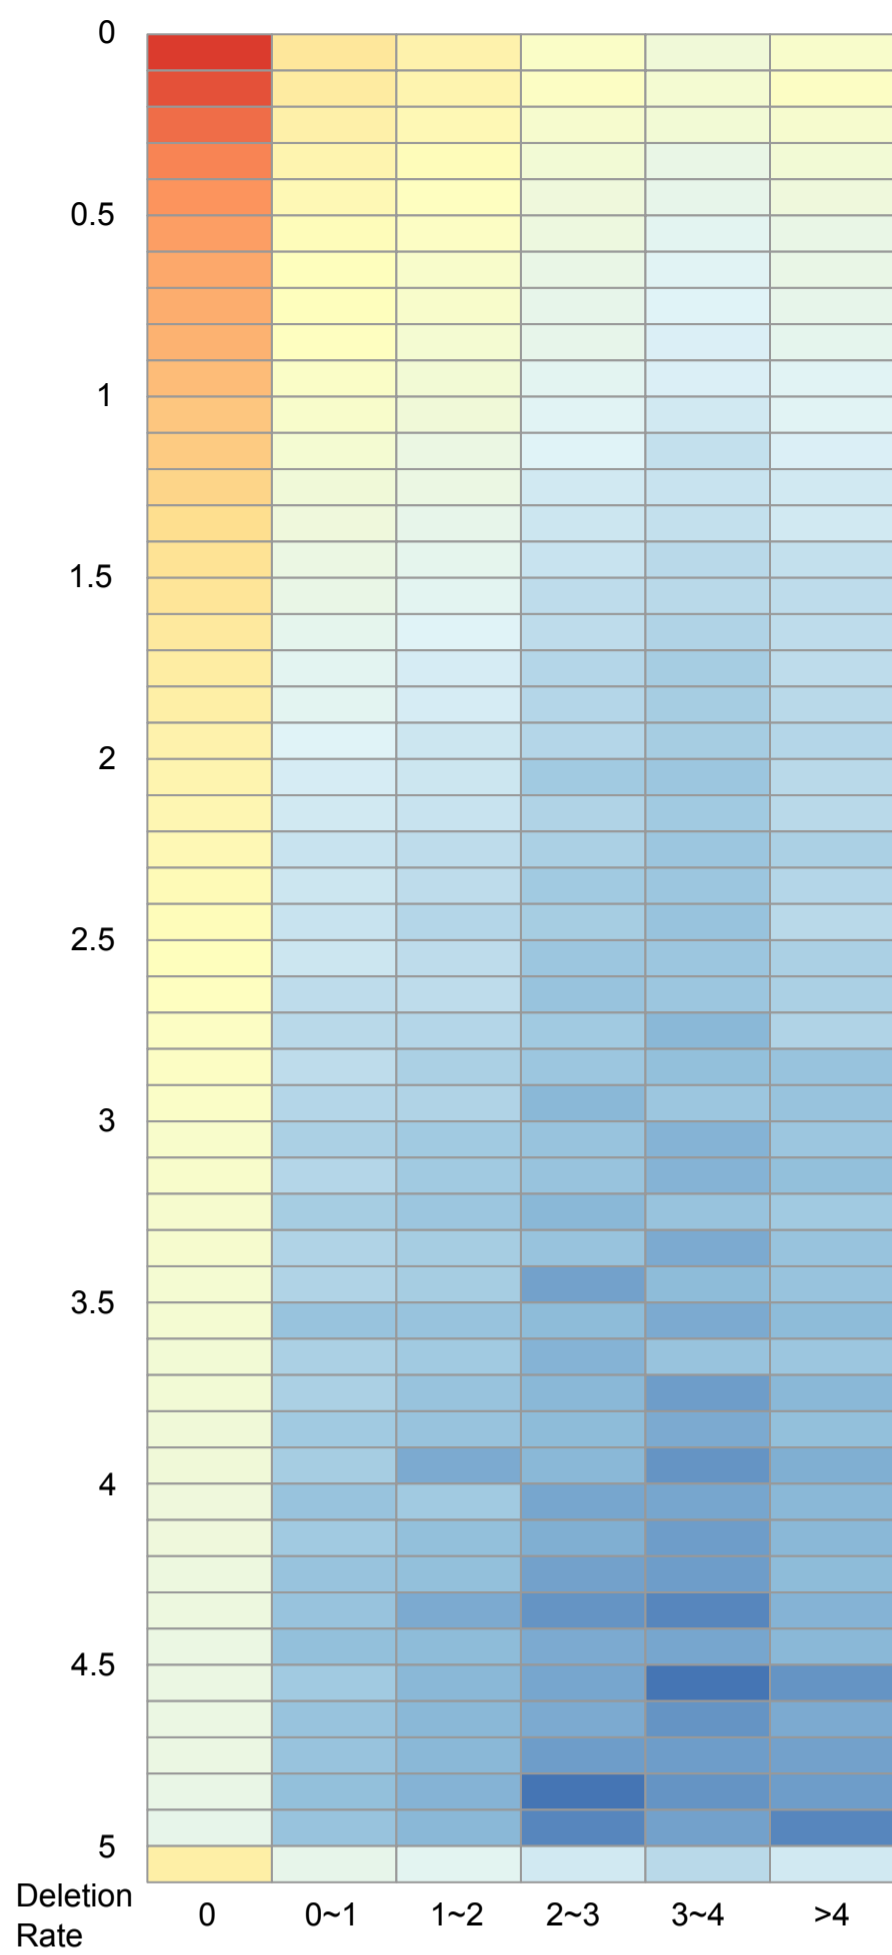

B. dN

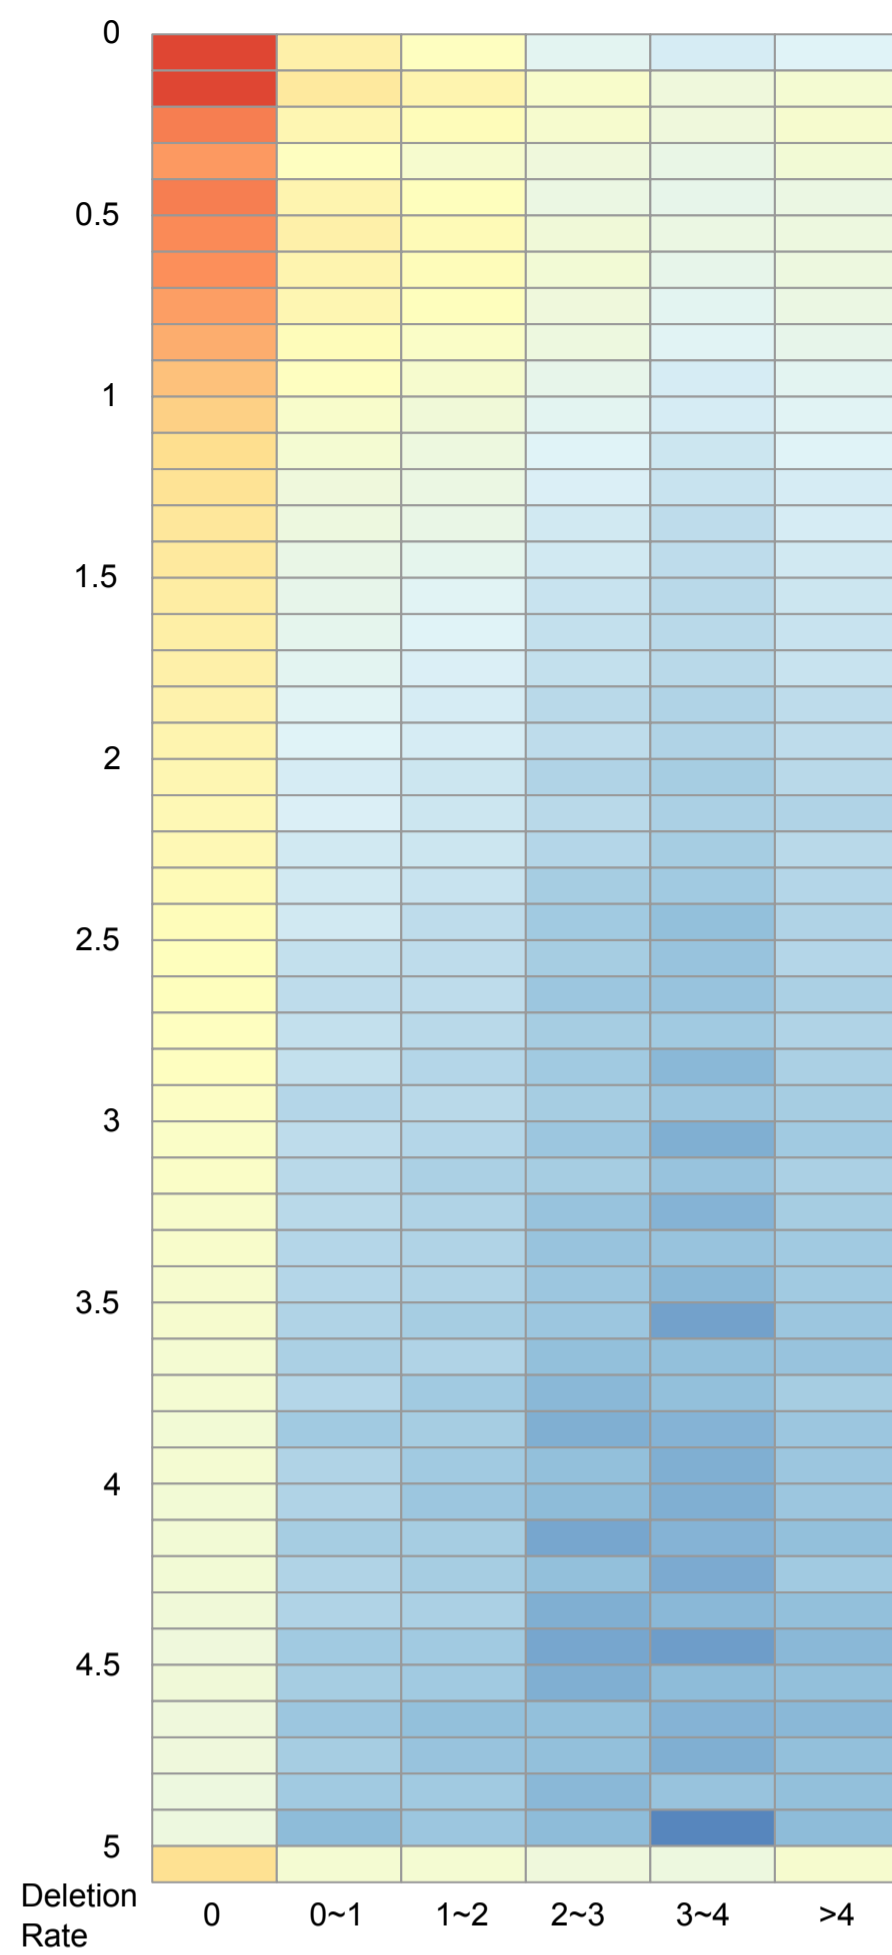

C. dS

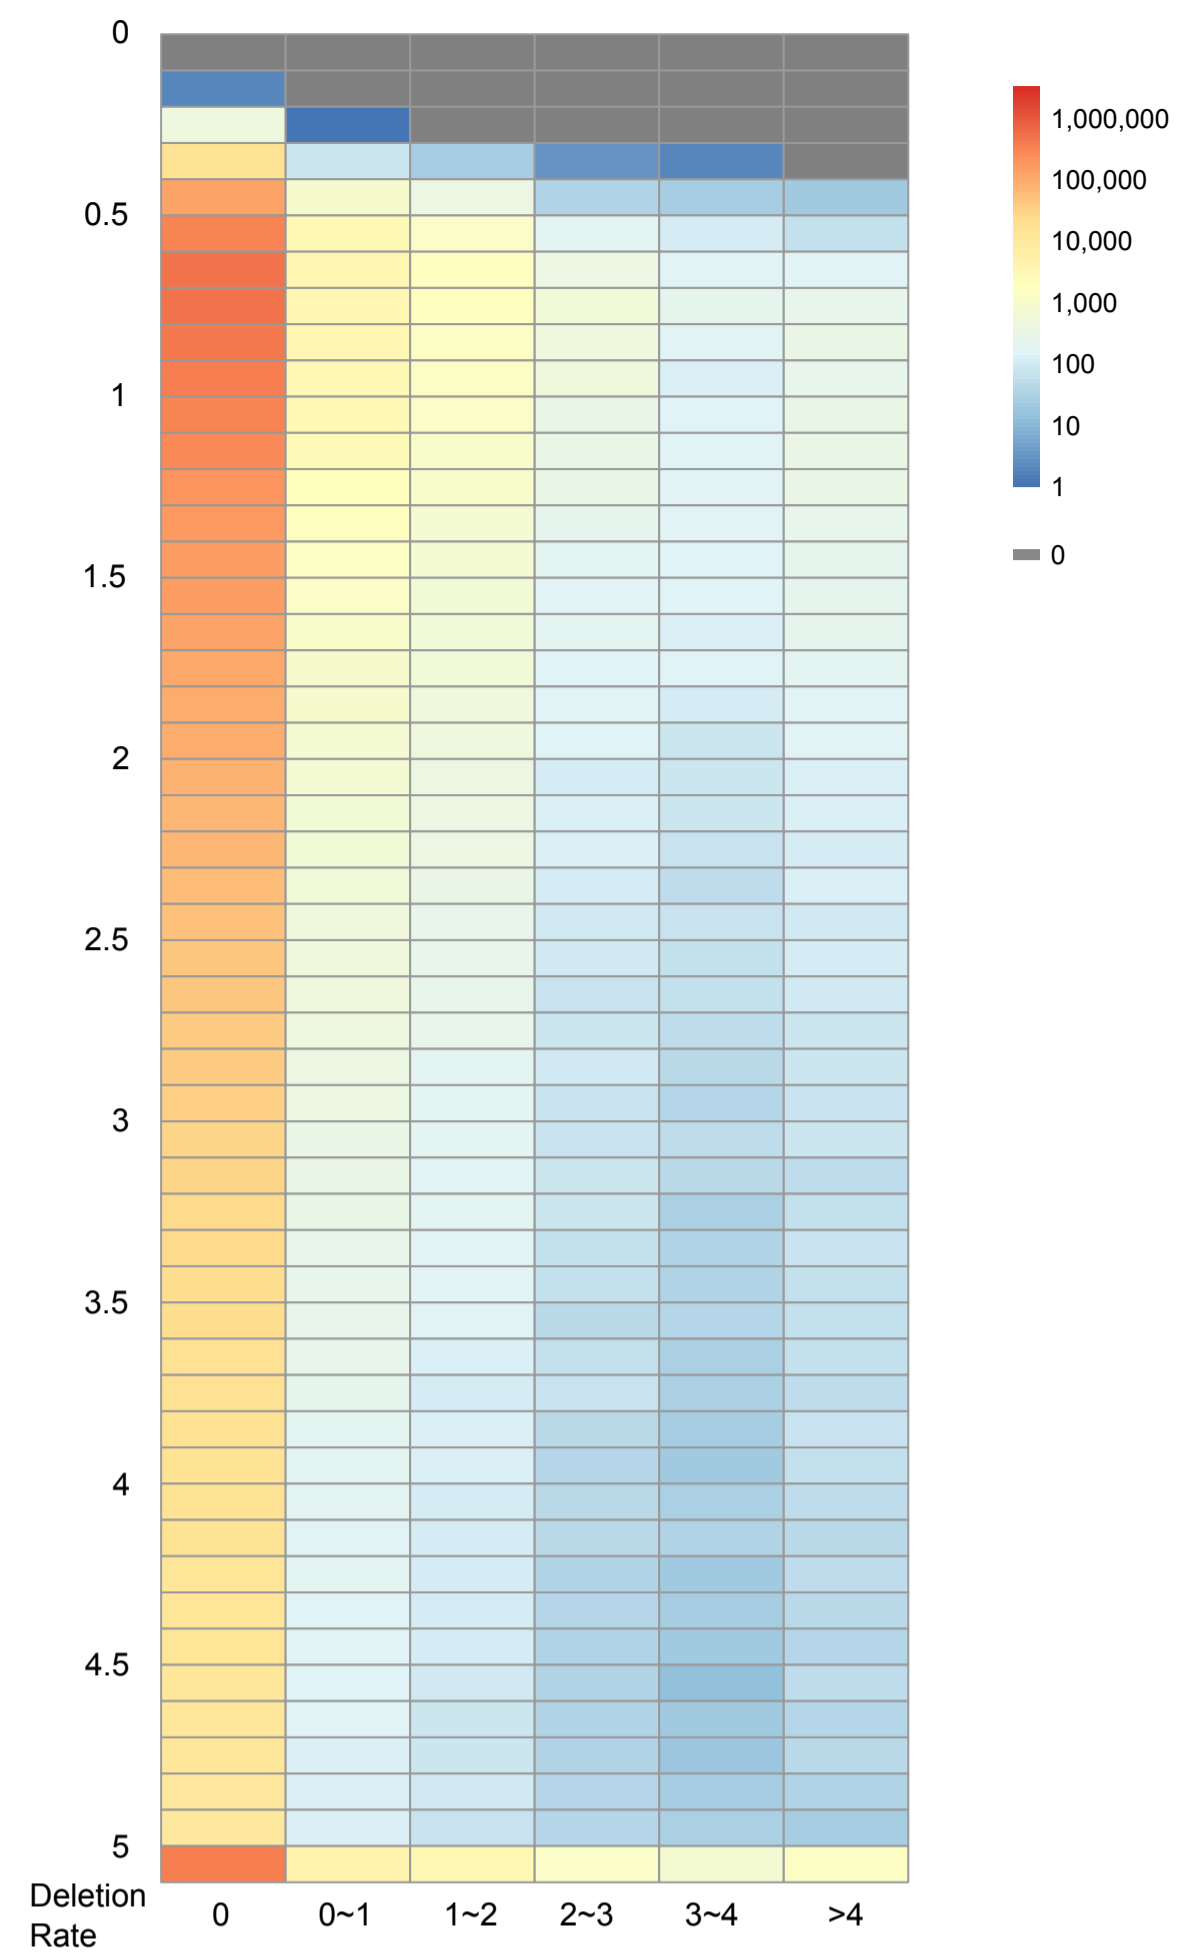

bioRxiv preprint doi: <https://doi.org/10.1101/215277>; this version posted April 11, 2018. The copyright holder for this preprint (which was not certified by peer review) is the author/funder, who has granted bioRxiv a license to display the preprint in perpetuity. It is made available under aCC-BY-NC-ND 4.0 International license.

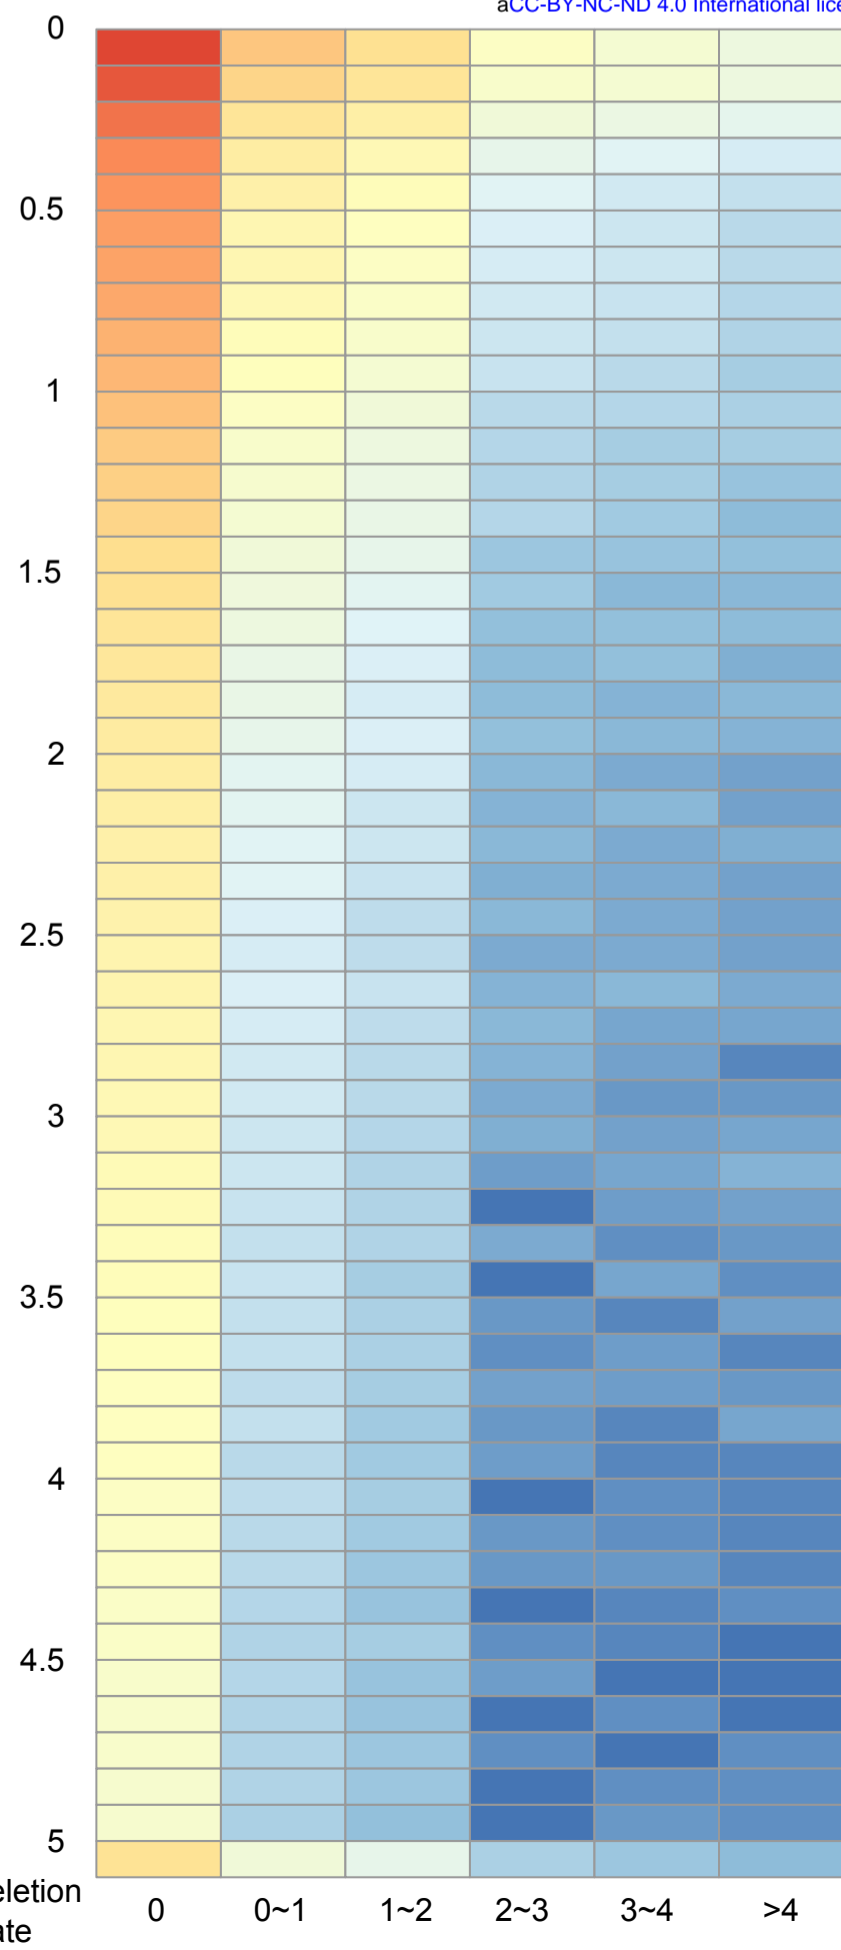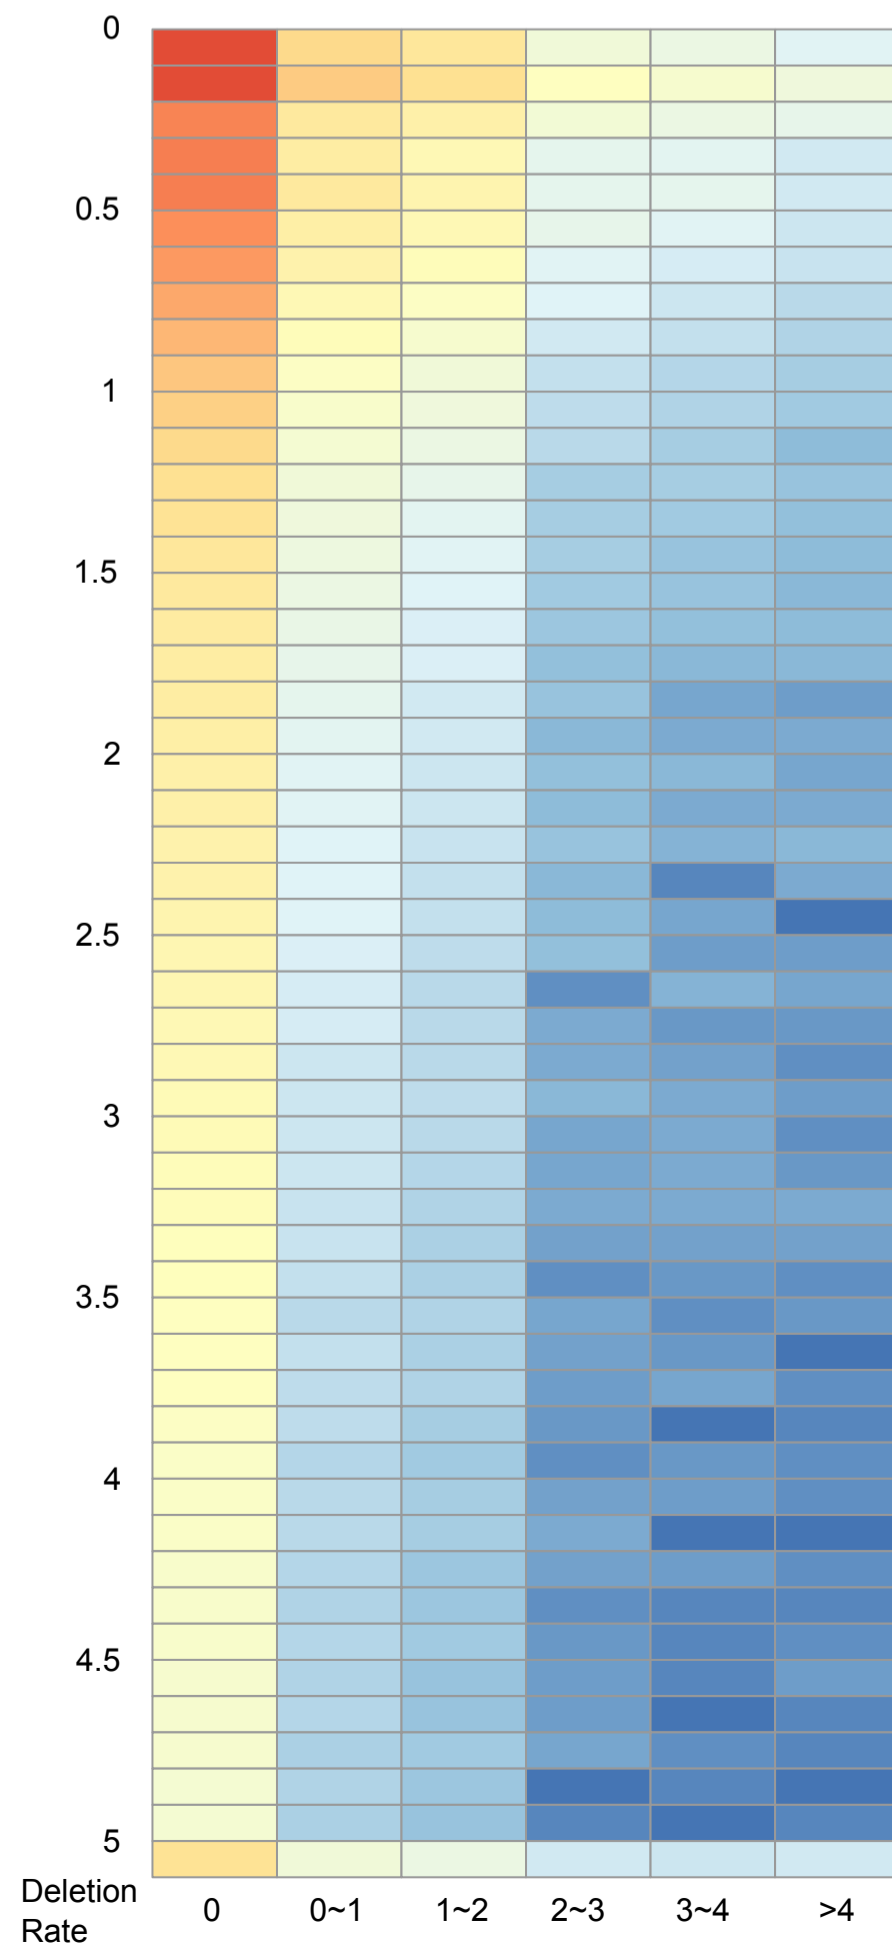

F. dS

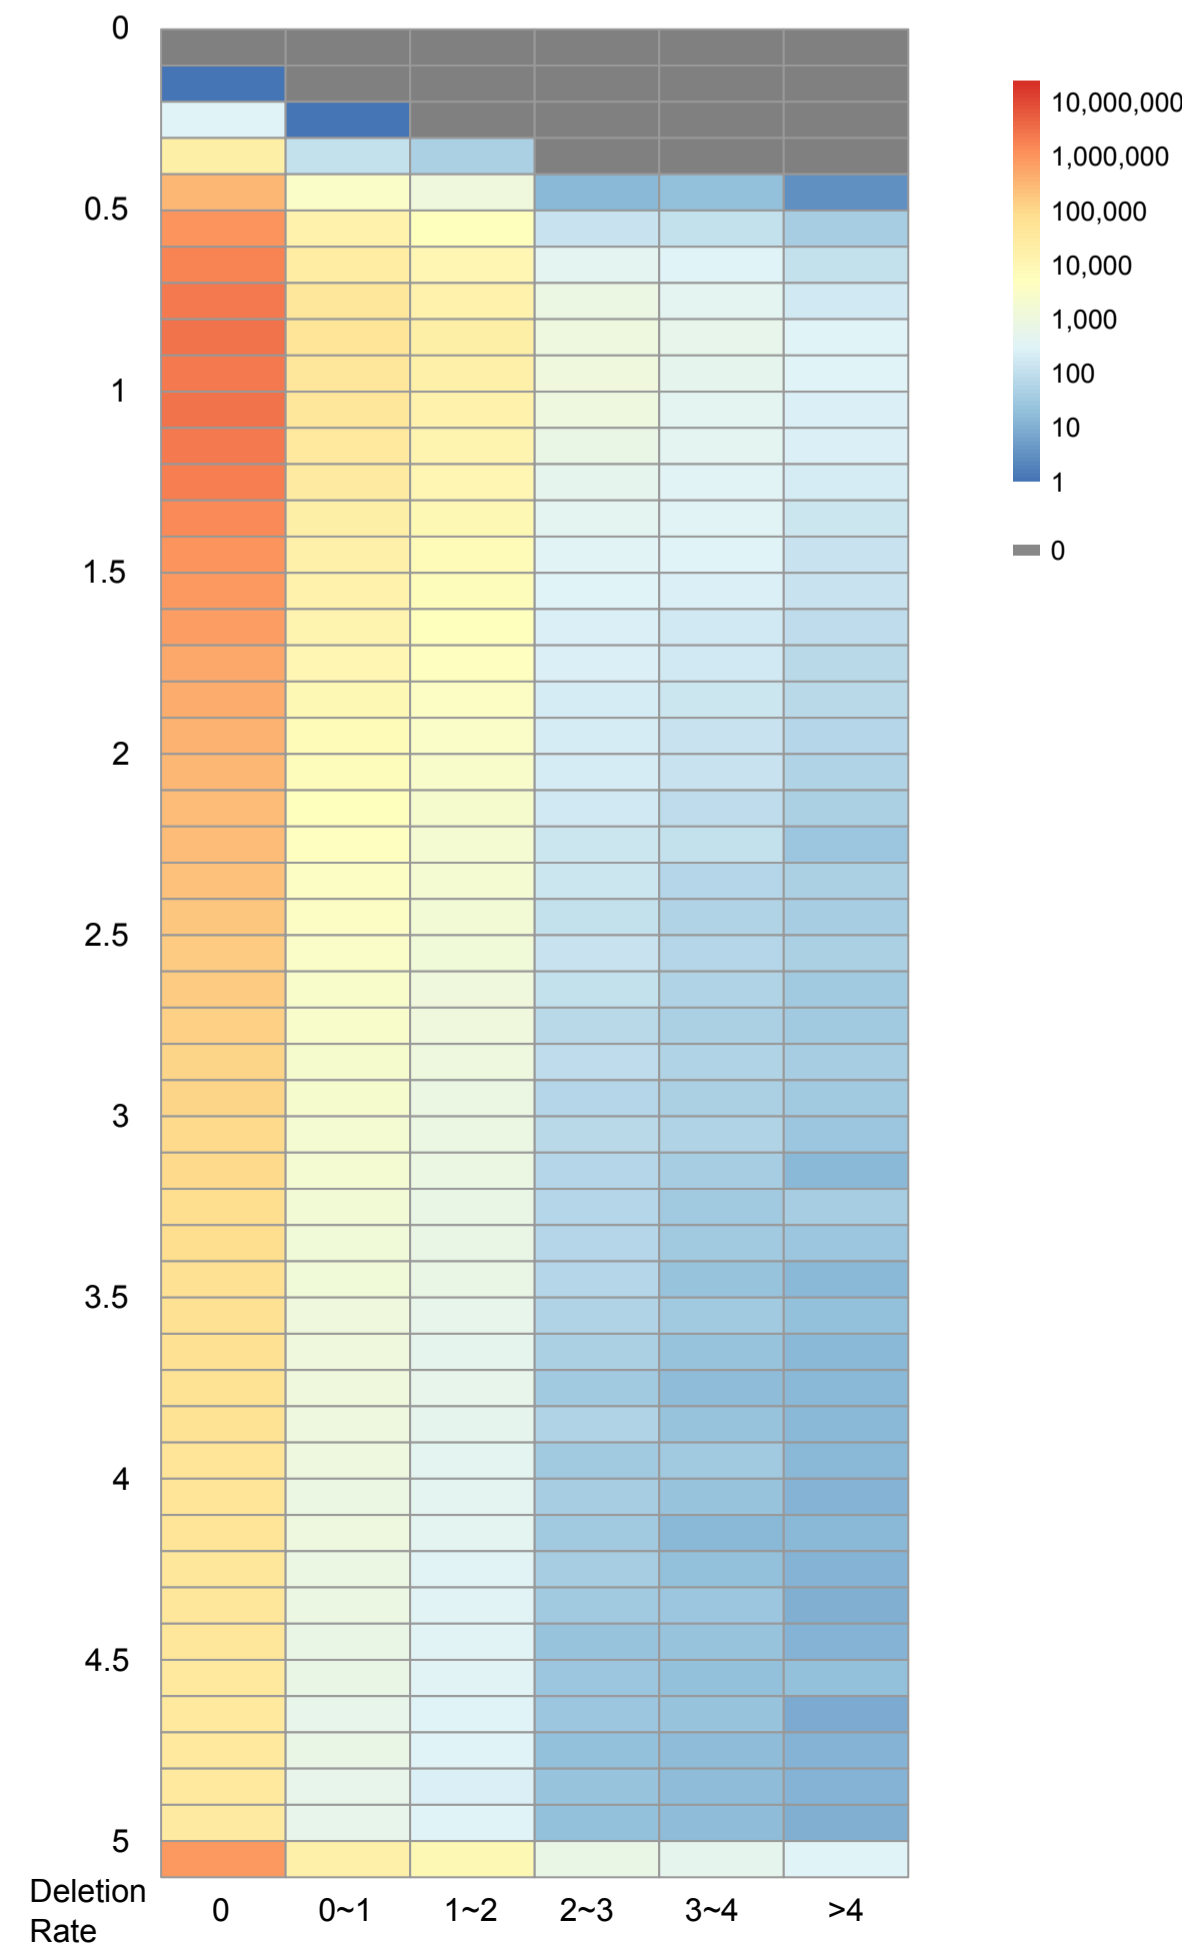

A

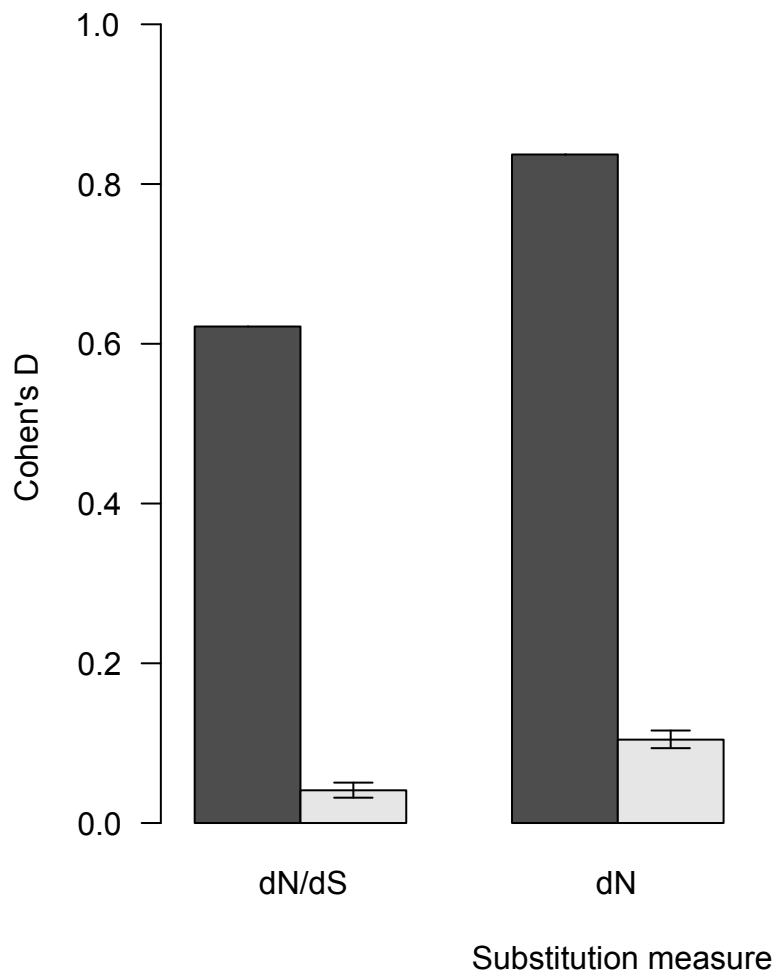

B

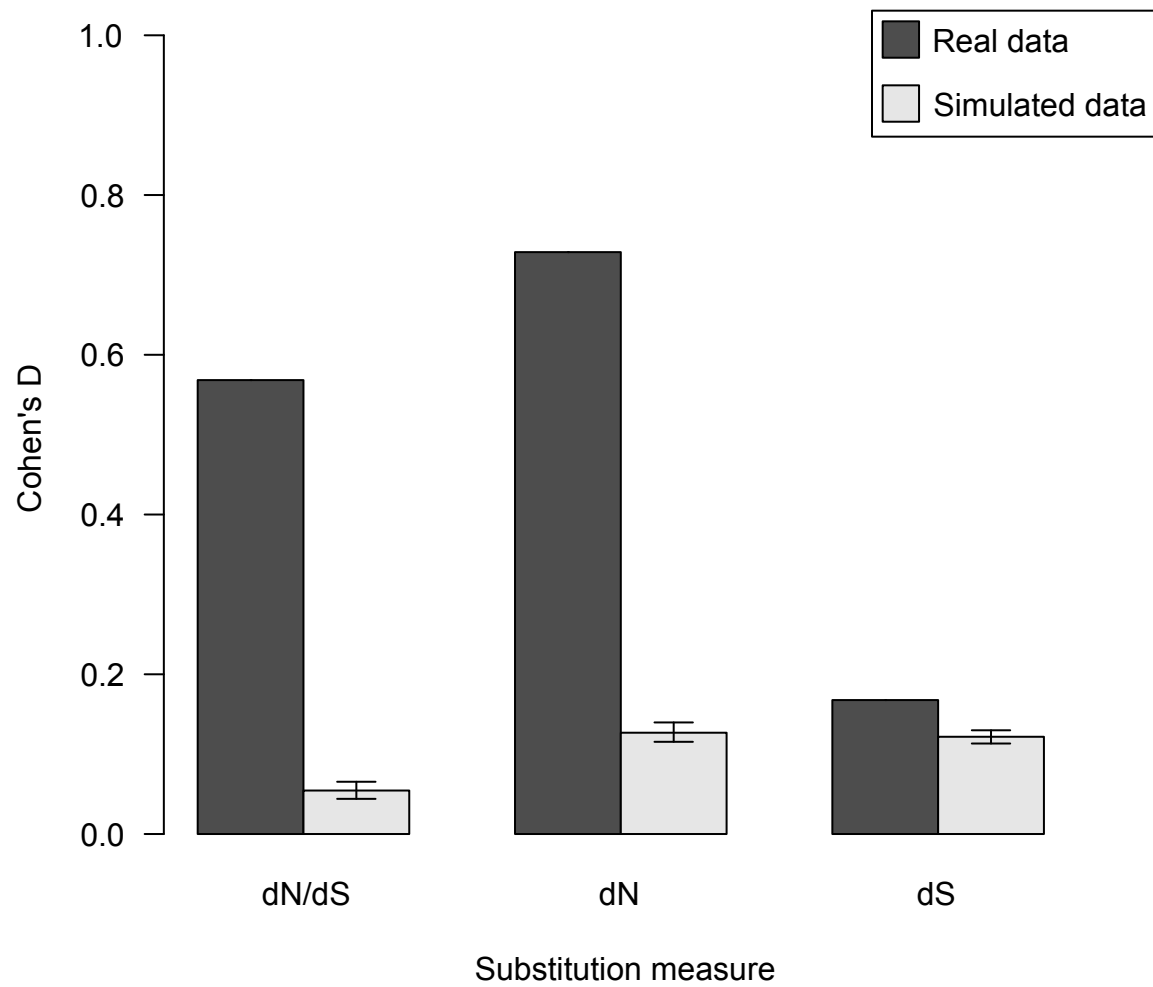

A

Real Data: Cohen's D = 0.57

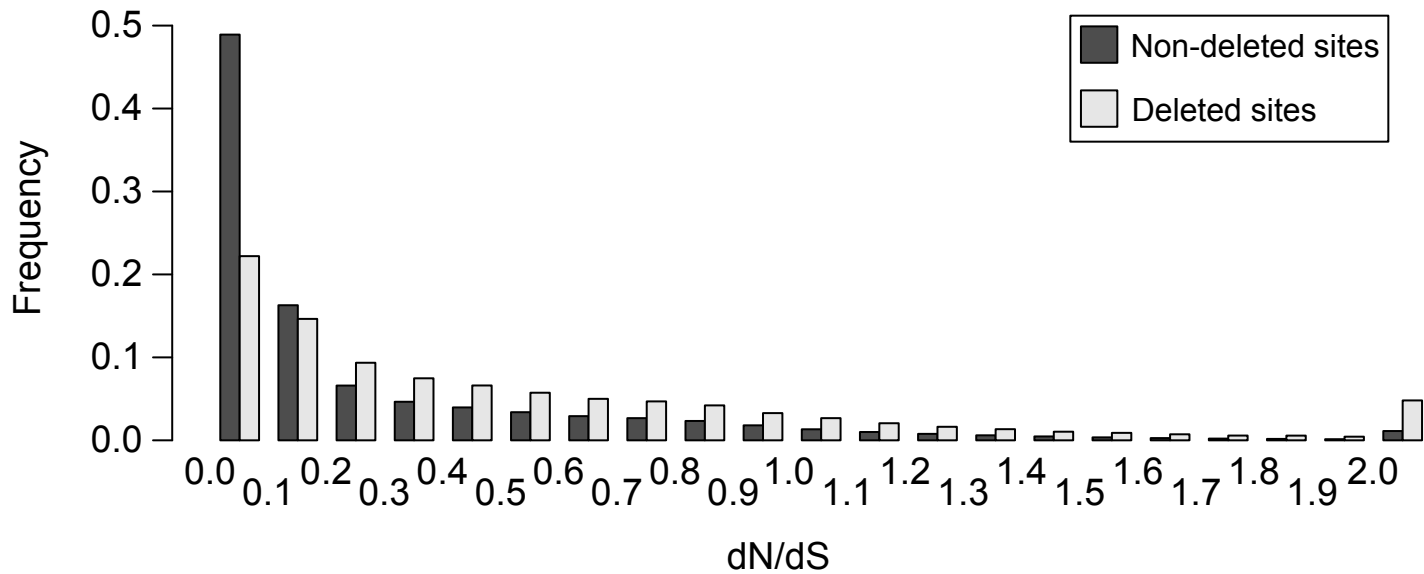

B

Simulated Data: Cohen's D = 0.05

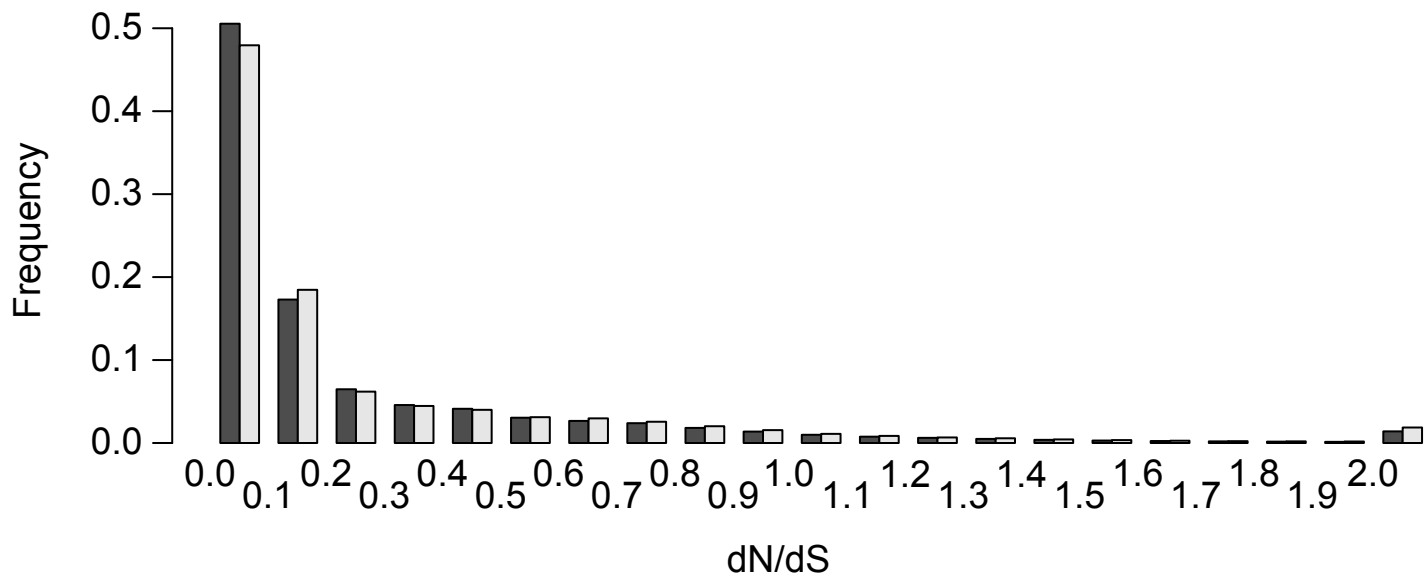

A

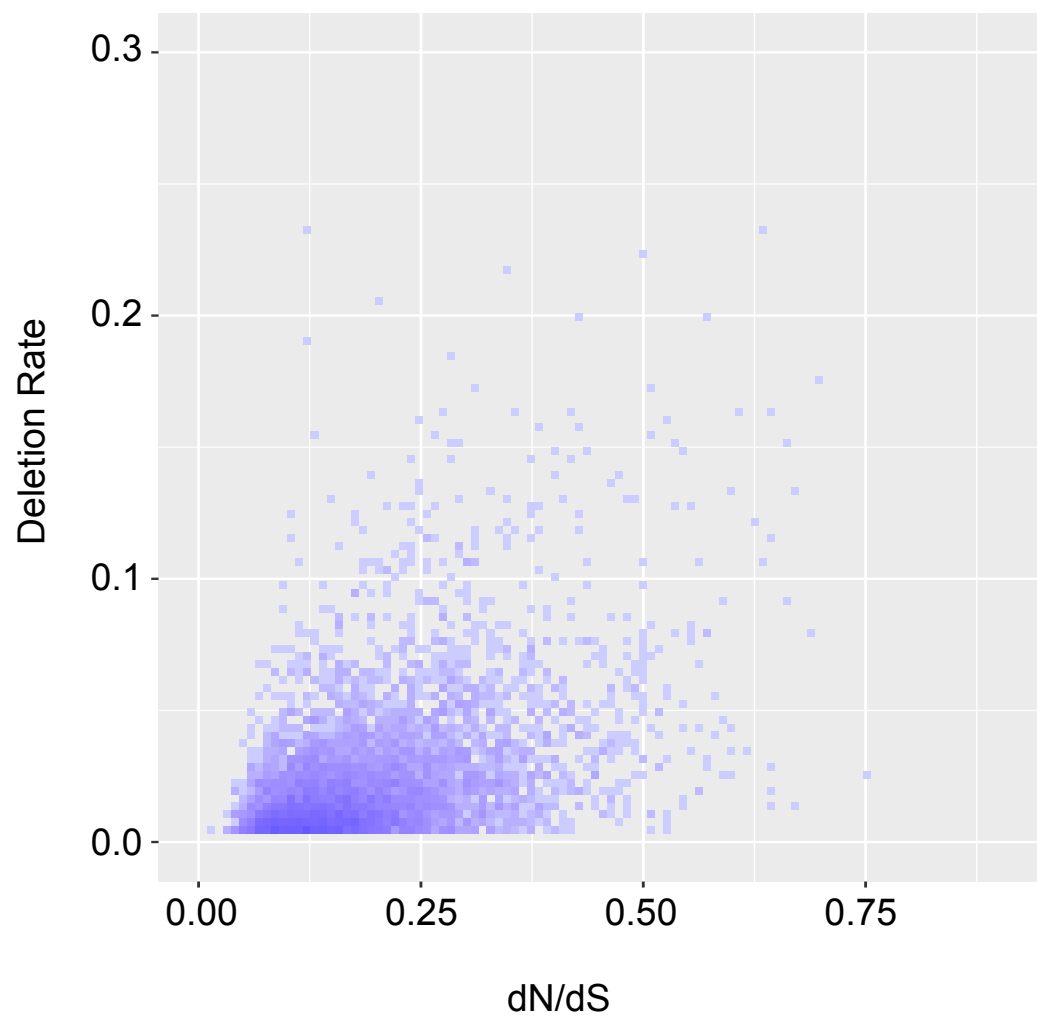

B

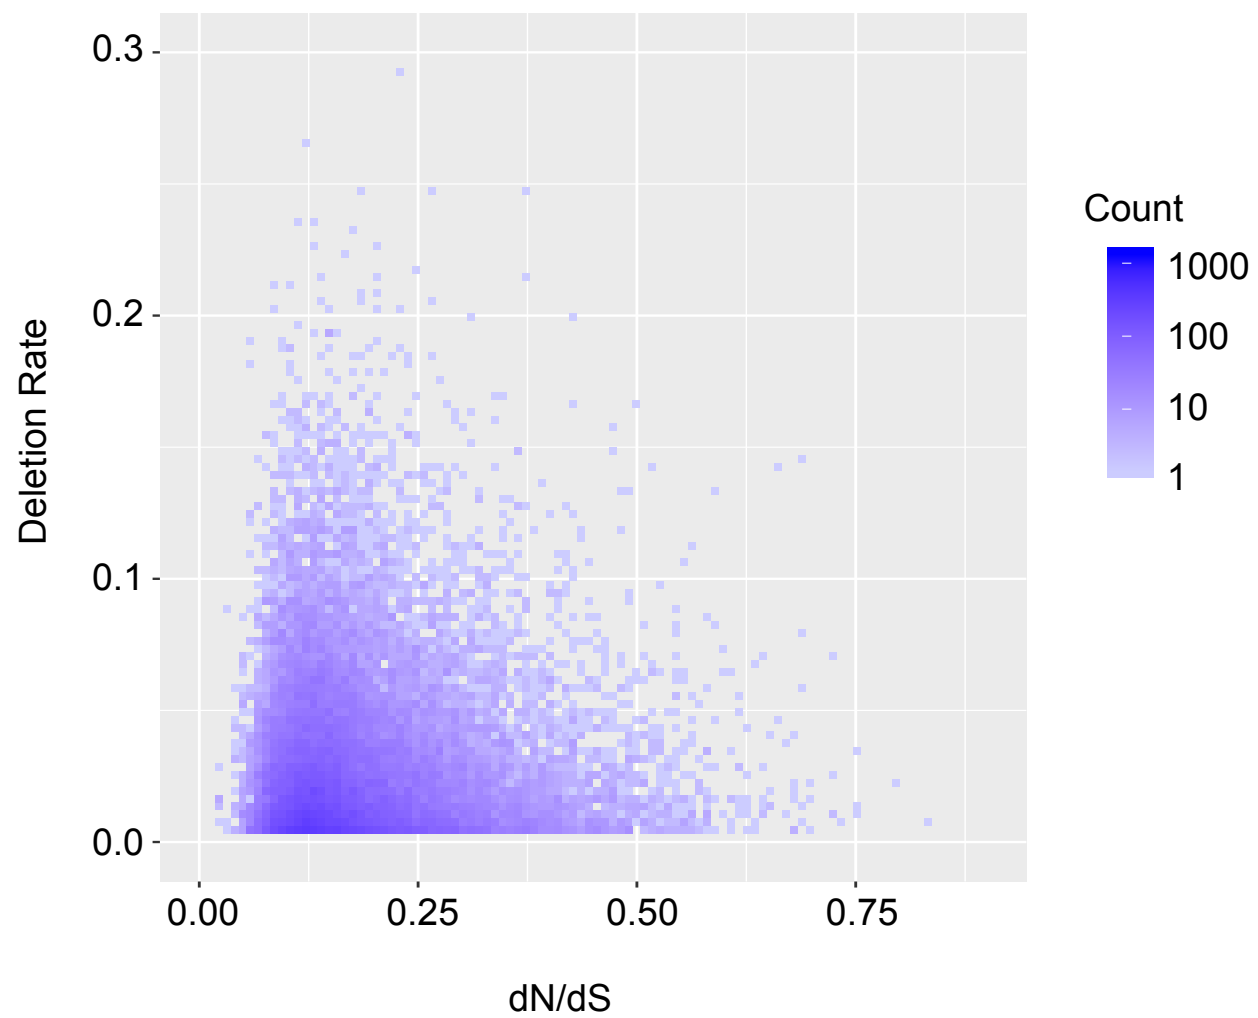

A

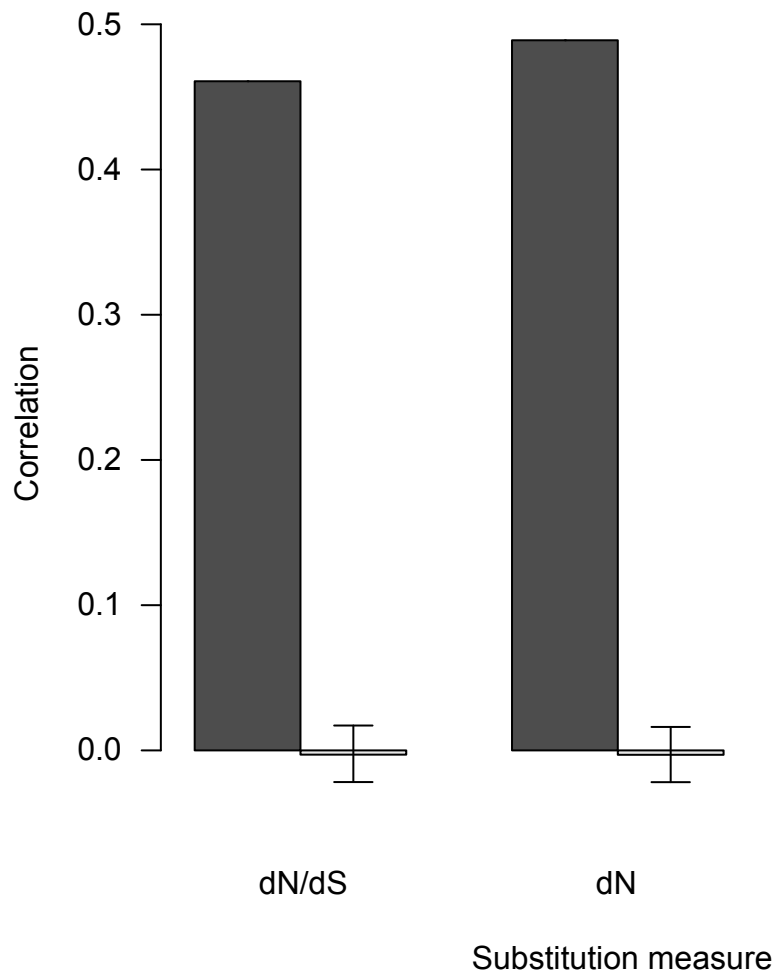

B

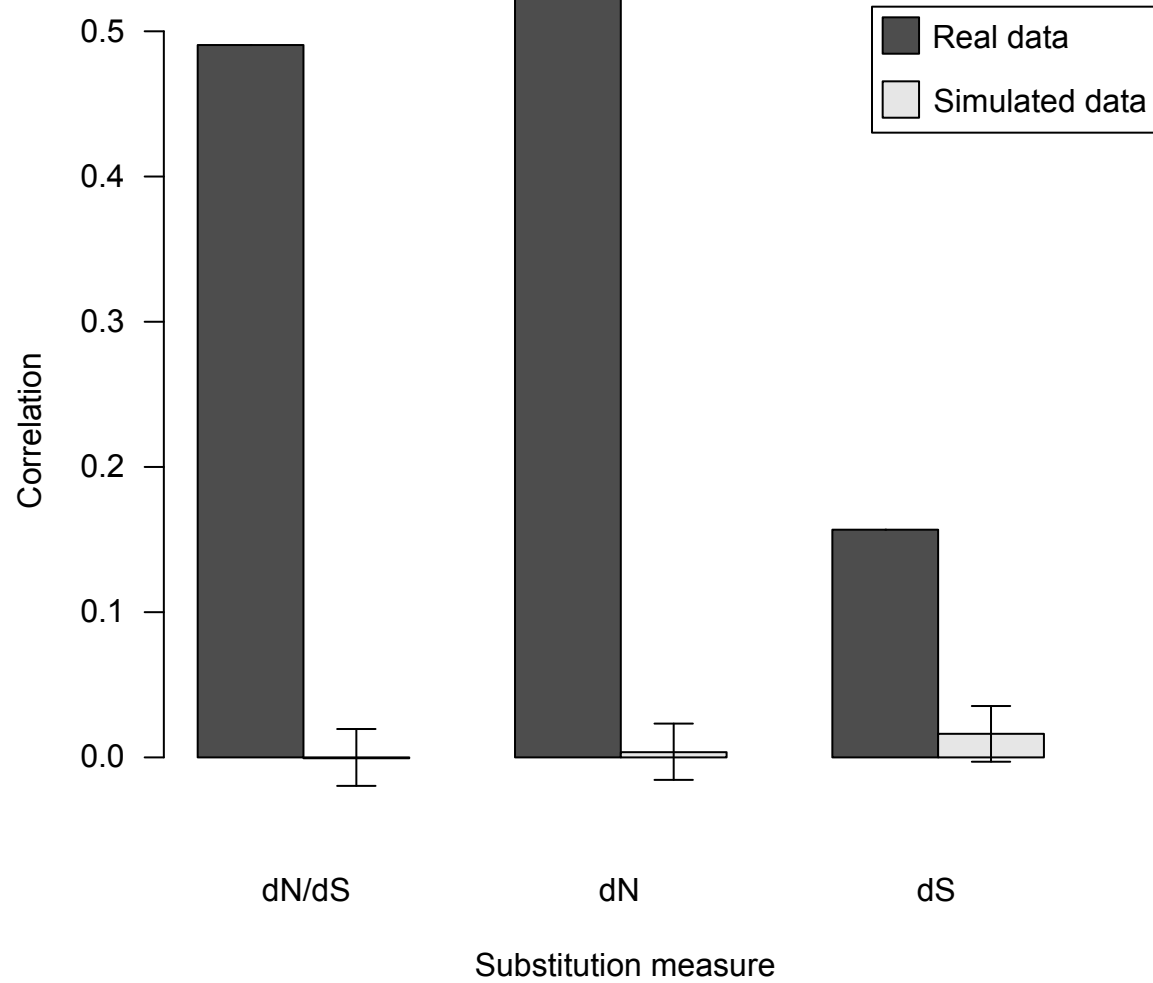



A

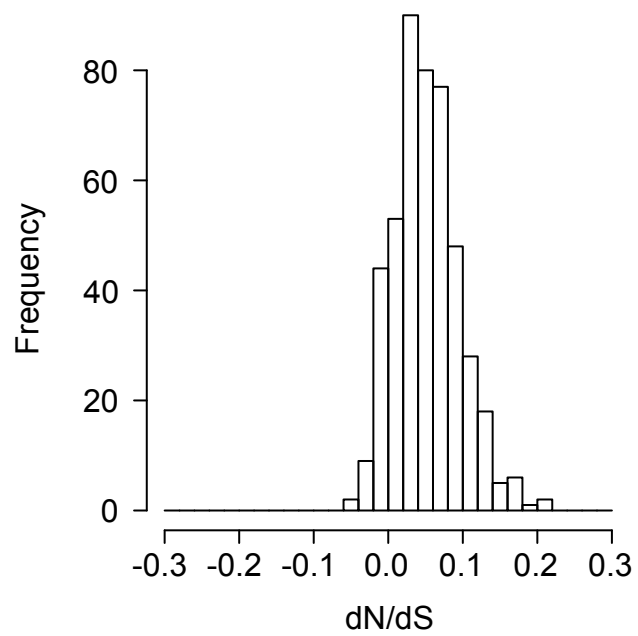

B

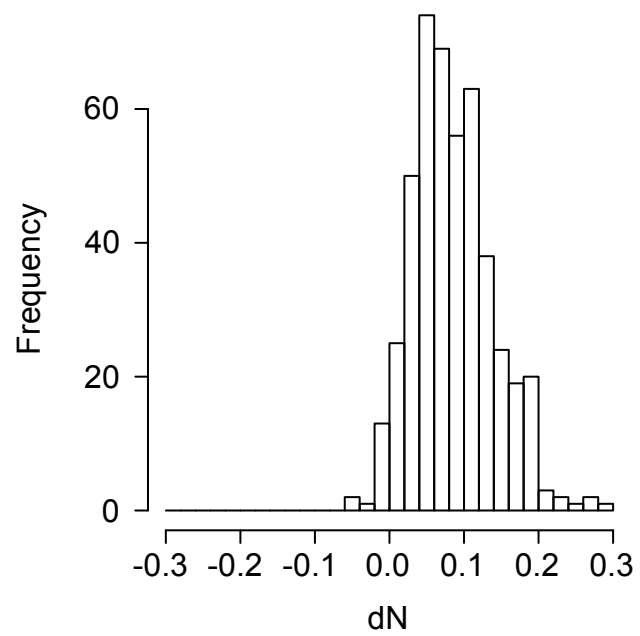

C

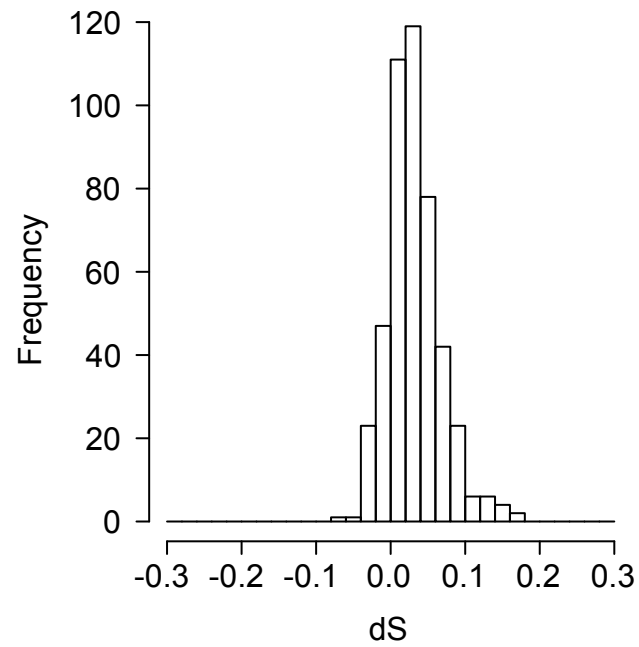

D

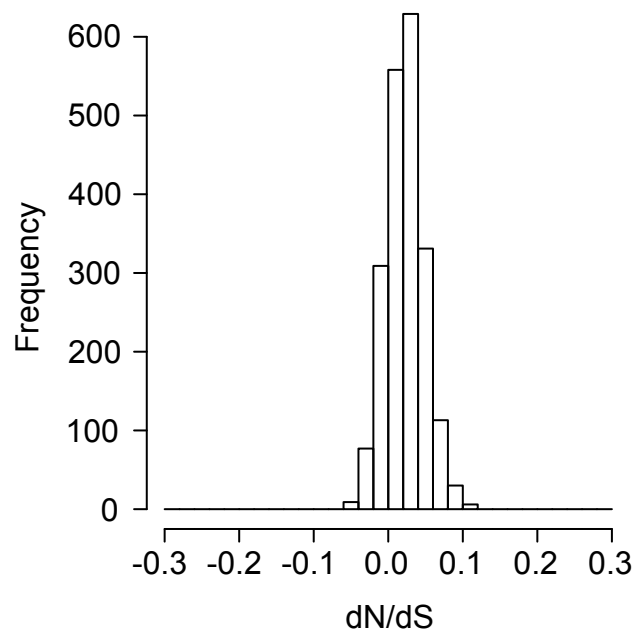

E

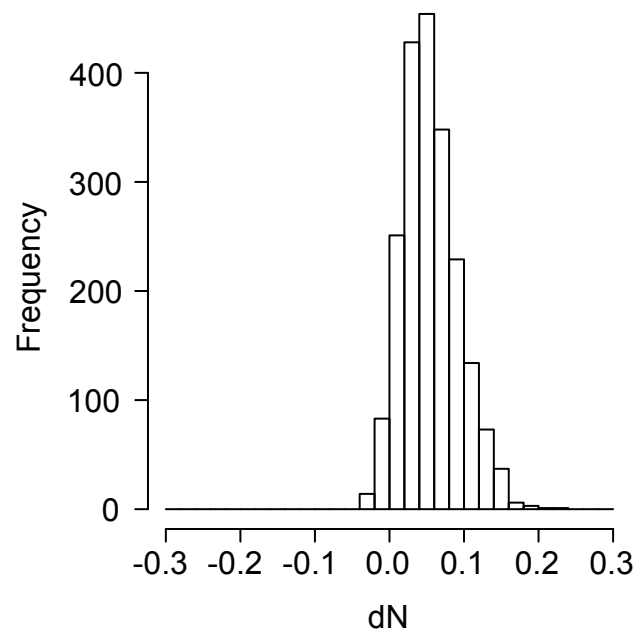

F

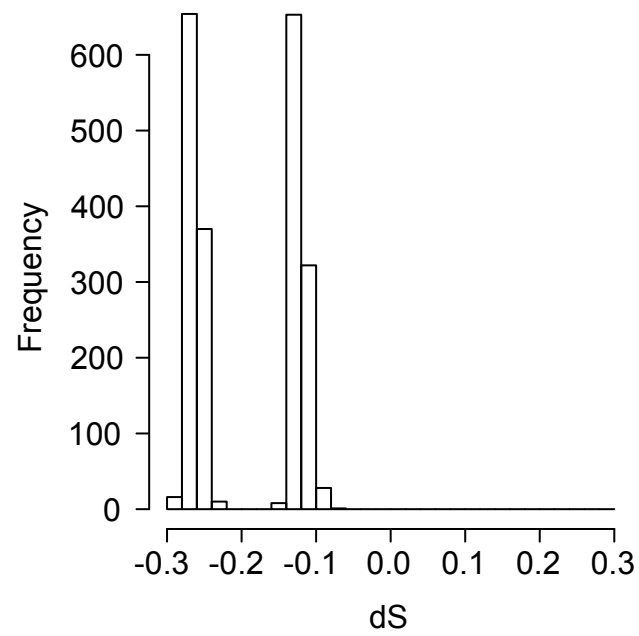

Source: http://biorxiv.org/content/10.1101/215277v2.full.pdf
